# Supplementary material for: N-Heterotriangulene chromophores with 4-pyridyl anchors for dye-sensitized solar cells
Source: Royal Society of Chemistry journal article supplement (doi:10.1039/c6ra14799b), 2016-01-01
Supplement: c6ra14799b1.pdf [file c6ra14799b1.pdf]

Electronic Supplementary Information (ESI)

## ***N*-Heterotriangulene chromophores with 4-pyridyl anchors for dye-sensitized solar cells**

Ute Meinhardt,<sup>a</sup> Fabian Lodermeier,<sup>b</sup> Tobias A. Schaub,<sup>a</sup> Andreas Kunzmann,<sup>b</sup> Pavlo O. Dral,<sup>c</sup> Anna Chiara Sale,<sup>a</sup> Frank Hampel,<sup>a</sup> Dirk M. Guldi,<sup>\*b</sup> Ruben D. Costa,<sup>\*b</sup> Milan Kivala<sup>\*a</sup>

<sup>a</sup> *Department of Chemistry and Pharmacy, Friedrich-Alexander University Erlangen-Nürnberg, Henkestraße 42, 91054 Erlangen, Germany. E-mail: milan.kivala@fau.de*

<sup>b</sup> *Department of Chemistry and Pharmacy, Friedrich-Alexander University Erlangen-Nürnberg, Egerlandstraße 3, 91058 Erlangen, Germany. E-Mail: dirk.guldi@fau.de; ruben.costa@fau.de*

<sup>c</sup> *Max-Planck-Institut für Kohlenforschung, Kaiser-Wilhelm-Platz 1, 45470 Mülheim an der Ruhr, Germany*

## Table of contents

|   |                                                                  |    |
|---|------------------------------------------------------------------|----|
| 1 | Experimental data and compound characterization .....            | 3  |
| 2 | $^1\text{H}$ and $^{13}\text{C}$ NMR spectra .....               | 7  |
| 3 | X-Ray structure analysis .....                                   | 10 |
| 4 | UV/vis absorption and emission spectroscopy.....                 | 12 |
| 5 | Dye-sensitized solar cell fabrication and characterization ..... | 15 |
| 6 | Frontier molecular orbital analysis .....                        | 19 |
| 7 | References .....                                                 | 38 |

## 1 Experimental data and compound characterization

**General procedures and methods.** Reagents were purchased reagent grade from commercial suppliers and used without further purification. Toluene was dried over molecular sieves (4 Å) and distilled over sodium and EtOH was distilled over magnesium. MgSO<sub>4</sub> was used as drying agent after aqueous work-up. All microwave reactions were performed in septa capped Biotage<sup>®</sup> microwave vials (10–20 mL) using Biotage<sup>®</sup> Initiator+ with stirring and the reaction temperature was controlled by the Biotage<sup>®</sup> Initiator+ software. <sup>1</sup>H and <sup>13</sup>C NMR spectra were recorded on a Bruker Avance 300 spectrometer (300 MHz for <sup>1</sup>H, 75 MHz for <sup>13</sup>C). NMR spectra were referenced to the residual solvent signal (<sup>1</sup>H: CDCl<sub>3</sub> 7.24 ppm; <sup>13</sup>C: CDCl<sub>3</sub> 77.0 ppm) and recorded at ambient probe temperature. Coupling constants (*J*) are given in Hz and the apparent resonance multiplicity is reported as br (broad), s (singlet), d (doublet), t (triplet), or m (multiplet). CDCl<sub>3</sub> (Deutero GmbH, 99.8%) was stored over molecular sieves (4 Å). IR spectra were recorded on a Varian 660-IR spectrometer as solids in ATR-mode and characteristic IR absorptions are reported in cm<sup>-1</sup> and denoted as strong (s), medium (m), and weak (w) as well as shoulder (sh). UV/vis measurements were performed on a Varian Cary 5000 UV/vis/NIR spectrophotometer at ambient probe temperature. Emission spectra were recorded using a Horiba Jobin Yvon Fluoromax-4 spectrofluorometer. Cyclic voltammetry was performed on a computer-controlled BAS CV-50W instrument at ambient probe temperature in CH<sub>2</sub>Cl<sub>2</sub> solutions (1.5 mM) containing 0.1 M *n*-Bu<sub>4</sub>NPF<sub>6</sub> as supporting electrolyte at a scan rate of 0.15 V s<sup>-1</sup>. Pt wire was used as counter electrode, Ag/AgNO<sub>3</sub> as reference electrode, and Pt as working electrode. The potential values (*E*<sup>1/2</sup>) were calculated using the following equation  $E^{1/2} = (E_{\text{red}} + E_{\text{ox}})/2$ , where *E*<sub>red</sub> and *E*<sub>ox</sub> correspond to the cathodic and anodic peak potentials, respectively. Mass spectra were obtained from a Bruker 9.4T Apex-Qe FTICR (MALDI), Bruker micro TOF II (ESI), and Bruker maxis 4G (APPI) instruments. Melting points were determined on a Büchi M-560 melting-point apparatus in open capillaries and are reported uncorrected. “Decomp.” refers to decomposition. TLC analyses were carried out on TLC plates from Macherey-Nagel (ALUGRAM<sup>®</sup> SIL G/UV254) and visualized via UV-light (264/364 nm) or standard coloring reagents. Column chromatography was performed using Merck Silica Gel 60M.

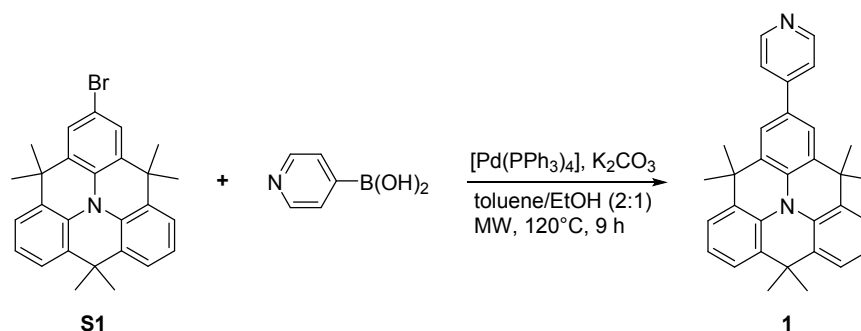

**4,4,8,8,12,12-Hexamethyl-2-pyridin-4-yl-4*H*,8*H*,12*H*-benzo[1,9]quinolino [3,4,5,6,7-*defg*]acridine (1).** Brominated *N*-heterotriangulene **S1** (20.0 mg, 45.0  $\mu\text{mol}$ ) and 4-pyridineboronic acid (8.30 mg, 68.0  $\mu\text{mol}$ , 1.4 equiv.) were dissolved in dry toluene/EtOH (2:1, 1.5 mL) under nitrogen in a high pressure reaction vessel.  $[\text{Pd}(\text{PPh}_3)_4]$  (0.50 mg, 0.50  $\mu\text{mol}$ , 1.1 mol%) and degassed aqueous  $\text{K}_2\text{CO}_3$ -solution (2.0 M, 0.15 mL) were added and the vessel was sealed. The reaction was carried out at 120  $^\circ\text{C}$  for 9 h under microwave irradiation. After the reaction mixture was cooled to room temperature, the solvent was removed under reduced pressure and the residue was purified by column chromatography ( $\text{SiO}_2$ , acetone/ $\text{CH}_2\text{Cl}_2$  1:4) to afford **1** (11.0 mg, 55%) as a yellow-orange solid.  $R_f = 0.52$  ( $\text{SiO}_2$ , acetone/ $\text{CH}_2\text{Cl}_2$  1:4); Mp 159.0 – 161.0  $^\circ\text{C}$ ; UV/vis ( $\text{CH}_2\text{Cl}_2$ )  $\lambda_{\text{max}}$  ( $\epsilon$ ) 301 (20200), 318 (sh, 17600), 364 (18700) nm; IR (ATR)  $\tilde{\nu}$  2959 (m), 2921 (m), 2853 (w), 1724 (w), 1593 (m), 1428 (s), 1315 (m), 1293 (m), 821 (m), 795 (m), 743 (m)  $\text{cm}^{-1}$ ;  $^1\text{H}$  NMR (300 MHz,  $\text{CDCl}_3$ )  $\delta$  8.64 (br s, 2H), 7.64 (s, 2H), 7.55 (br s, 2H), 7.39 (d,  $J = 7.8$  Hz, 4H), 7.15 (t,  $J = 7.7$  Hz, 2H), 1.67 (s, 12H), 1.64 (s, 6H) ppm;  $^{13}\text{C}$  NMR (75.5 MHz,  $\text{CDCl}_3$ )  $\delta$  150.2, 148.1, 133.0, 131.8, 131.4, 130.4, 130.1, 129.7, 123.9, 123.5, 123.3, 121.8, 120.9, 35.7, 35.5, 33.4, 33.0 ppm; MALDI MS (sin)  $m/z$  442 ( $[\text{M}]^+$ , 100), 427 ( $[\text{M} - \text{CH}_3]^+$ , 60). ESI HRMS (MeOH/MeCN, positive mode) calcd for  $\text{C}_{32}\text{H}_{31}\text{N}_2$   $[\text{M} + \text{H}]^+$  443.2482, found 443.2487; Anal. calcd for  $\text{C}_{32}\text{H}_{30}\text{N}_2 \times 2\text{H}_2\text{O}$ : C, 80.30; H, 7.16; N, 5.85; found: C, 80.34; H, 6.94; N, 5.40.

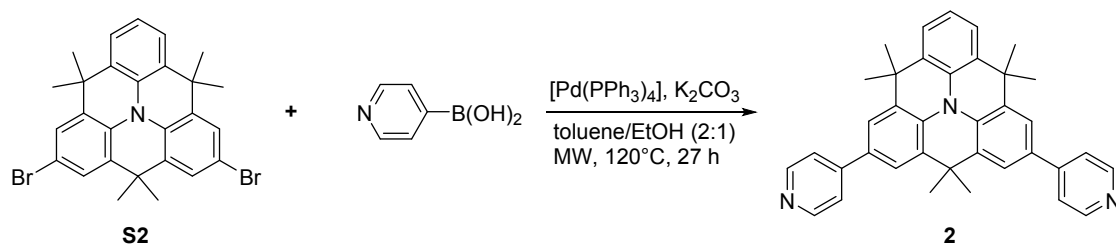

**4,4,8,8,12,12-Hexamethyl-2,6-dipyridin-4-yl-4*H*,8*H*,12*H*-benzo[1,9]quinolizino [3,4,5,6,7-*defg*]acridine (2).** Dibrominated *N*-heterotriangulene **S2** (200 mg, 0.38 mmol) and 4-pyridineboronic acid (280 mg, 2.31 mmol, 6.1 equiv.) were dissolved in toluene/EtOH (2:1, 15 mL) under nitrogen in a high pressure reaction vessel. [Pd(PPh<sub>3</sub>)<sub>4</sub>] (4.40 mg, 3.80 μmol, 1.0 mol%) and degassed aqueous K<sub>2</sub>CO<sub>3</sub>-solution (2.0 M, 2.0 mL) were added and the vessel was sealed. The reaction mixture was stirred at 120 °C for 27 h under microwave irradiation. After the reaction mixture was cooled to room temperature, the solvent was removed under reduced pressure and the residue was purified by column chromatography (SiO<sub>2</sub>, acetone/CH<sub>2</sub>Cl<sub>2</sub> 1:4 → 1:1) to afford **2** (160 mg, 81%) as an orange solid. *R*<sub>f</sub> = 0.31 (SiO<sub>2</sub>, acetone/CH<sub>2</sub>Cl<sub>2</sub> 1:4); Mp ~248 °C (decomp.); UV/vis (CH<sub>2</sub>Cl<sub>2</sub>) λ<sub>max</sub> (ε) 323 (15300), 376 (17300) nm; IR (ATR)  $\tilde{\nu}$  2964 (w), 2924 (w), 2853 (w), 1712 (w), 1596 (m), 1435 (s), 1315 (m), 1289 (m), 820 (m), 766 (w), 737 (w) cm<sup>-1</sup>; <sup>1</sup>H NMR (300 MHz, CDCl<sub>3</sub>) δ 8.66 (d, *J* = 5.4 Hz, 4H), 7.67 (s, 4H), 7.55 (dd, *J* = 4.6, 1.5 Hz, 4H), 7.42 (d, *J* = 7.8 Hz, 2H), 7.18 (t, *J* = 7.7 Hz, 1H), 1.74 (s, 6H), 1.70 (s, 12H) ppm; <sup>13</sup>C NMR (75.5 MHz, CDCl<sub>3</sub>) δ 150.2, 147.9, 132.5, 132.4, 131.0, 130.8, 130.4, 129.9, 123.9, 123.8, 122.3, 121.9, 120.9, 35.8, 35.7, 33.3, 33.0 ppm; LDI MS *m/z* 519 ([M]<sup>+</sup>, 100), 504 ([M - CH<sub>3</sub>]<sup>+</sup>, 30). ESI HRMS (MeCN/toluene/THF, positive mode) calcd for C<sub>37</sub>H<sub>34</sub>N<sub>3</sub> [M + H]<sup>+</sup> 520.2747, found 520.2754; Anal. calcd for C<sub>37</sub>H<sub>33</sub>N<sub>3</sub> × H<sub>2</sub>O: C, 82.65; H, 6.56; N, 7.81; found: C, 82.82; H, 6.42; N, 7.95.

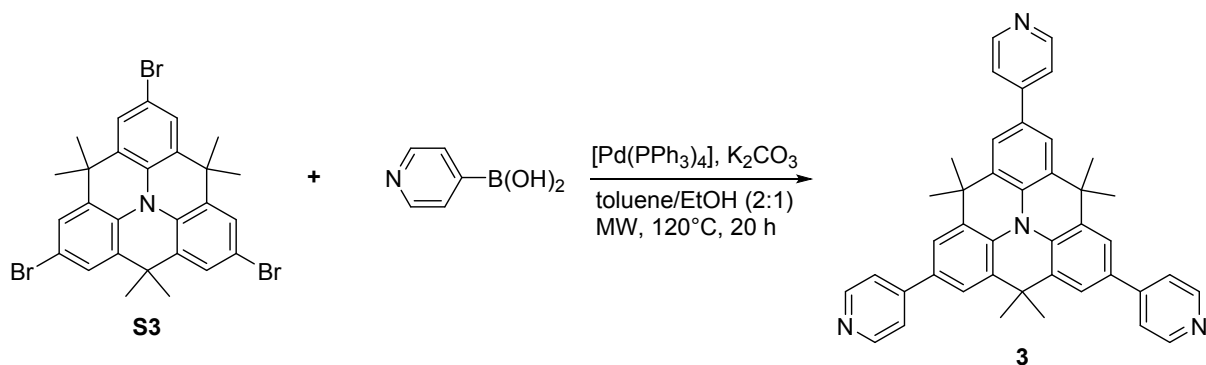

**4,4,8,8,12,12-Hexamethyl-2,6,10-tripyridin-4-yl-4*H*,8*H*,12*H*-benzo[1,9]quinolino[3,4,5,6,7-*defg*]acridine (3).** Tribrominated *N*-heterotriangulene **S3** (80 mg, 0.13 mmol) and 4-pyridineboronic acid (82 mg, 0.67 mmol, 5.2 equiv.) were dissolved in dry toluene/EtOH (2:1, 6 mL) under nitrogen in a high pressure reaction vessel. [Pd(PPh<sub>3</sub>)<sub>4</sub>] (1.5 mg, 1.3 μmol) and degassed aqueous K<sub>2</sub>CO<sub>3</sub>-solution (2.0 M, 0.6 mL) was added to the reaction mixture and the vessel was sealed. The reaction mixture was stirred at 120 °C for 20 h under microwave irradiation. After the reaction mixture was cooled to room temperature, the solvent was removed under reduced pressure and the residue was purified by column chromatography (SiO<sub>2</sub>, EtOAc/MeOH, 9:1) to afford **3** (68 mg, 86%) as a red-orange solid. *R*<sub>f</sub> = 0.04 (SiO<sub>2</sub>, EtOAc); Mp ~260 °C (decomp.); UV/vis (CH<sub>2</sub>Cl<sub>2</sub>) λ<sub>max</sub> (ε) 330 (12900), 373 (21700) nm; IR (ATR)  $\tilde{\nu}$  2965 (w), 2918 (m), 2851 (w), 1725 (w), 1593 (m), 1438 (s), 1311 (s), 1288 (m), 1260 (m), 893 (m), 820 (s), 795 (s), 764 (m), 727 (m) cm<sup>-1</sup>; <sup>1</sup>H NMR (300 MHz, CDCl<sub>3</sub>) δ 8.67 (d, *J* = 5.7 Hz, 6H), 7.69 (s, 6H), 7.56 (d, *J* = 6.0 Hz, 6H), 1.76 (s, 18H) ppm; <sup>13</sup>C NMR (75.5 MHz, CDCl<sub>3</sub>) δ 150.3, 147.8, 132.9, 132.1, 130.7, 122.3, 121.0, 35.9, 33.3 ppm; LDI MS *m/z* 596 ([M]<sup>+</sup>, 100), 581 ([M – CH<sub>3</sub>]<sup>+</sup>, 90). ESI HRMS (CH<sub>2</sub>Cl<sub>2</sub>/MeCN, positive mode) calcd for C<sub>42</sub>H<sub>37</sub>N<sub>4</sub> [M + H]<sup>+</sup> 597.3013, found 597.2995; Anal. calcd for C<sub>42</sub>H<sub>36</sub>N<sub>4</sub> × 4H<sub>2</sub>O: C, 75.42; H, 6.63; N, 8.38; found: C, 74.93; H, 5.88; N, 8.12.

## 2 $^1\text{H}$ and $^{13}\text{C}$ NMR spectra

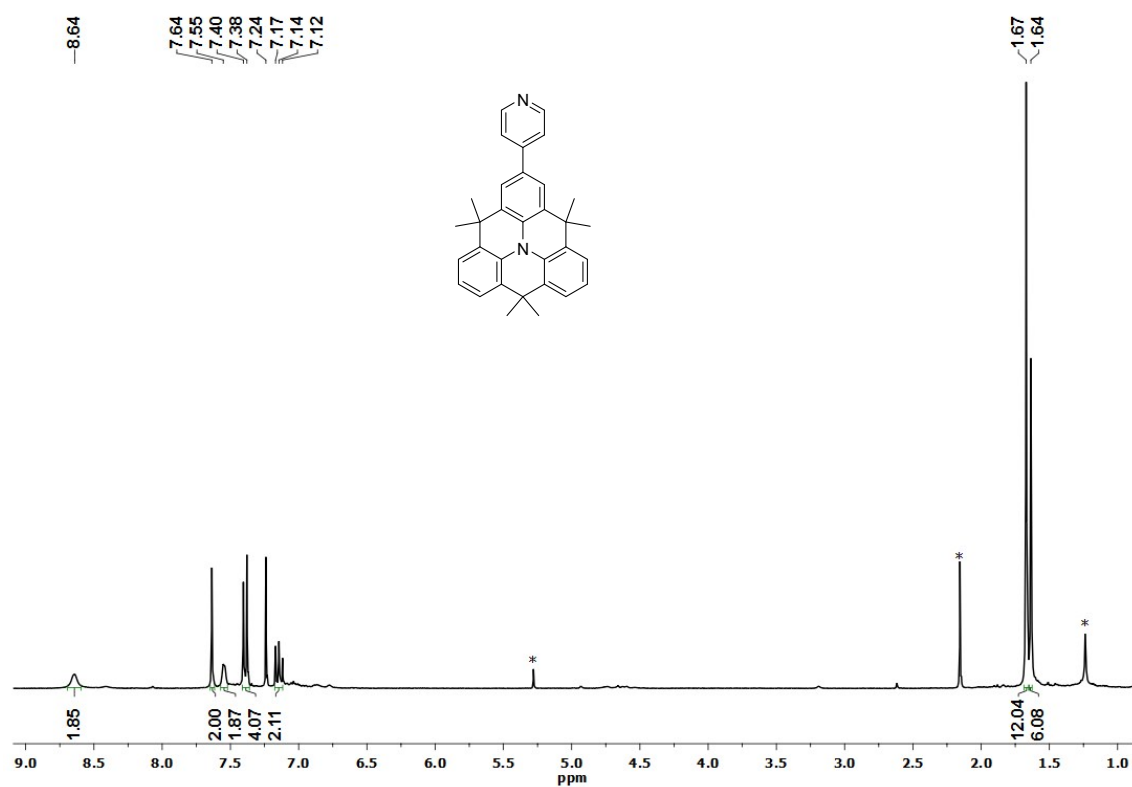

Fig. S1.  $^1\text{H}$  NMR spectrum of 1 (300 MHz,  $\text{CDCl}_3$ ); \* residual solvents:  $\text{CH}_2\text{Cl}_2$ , acetone, hexanes.

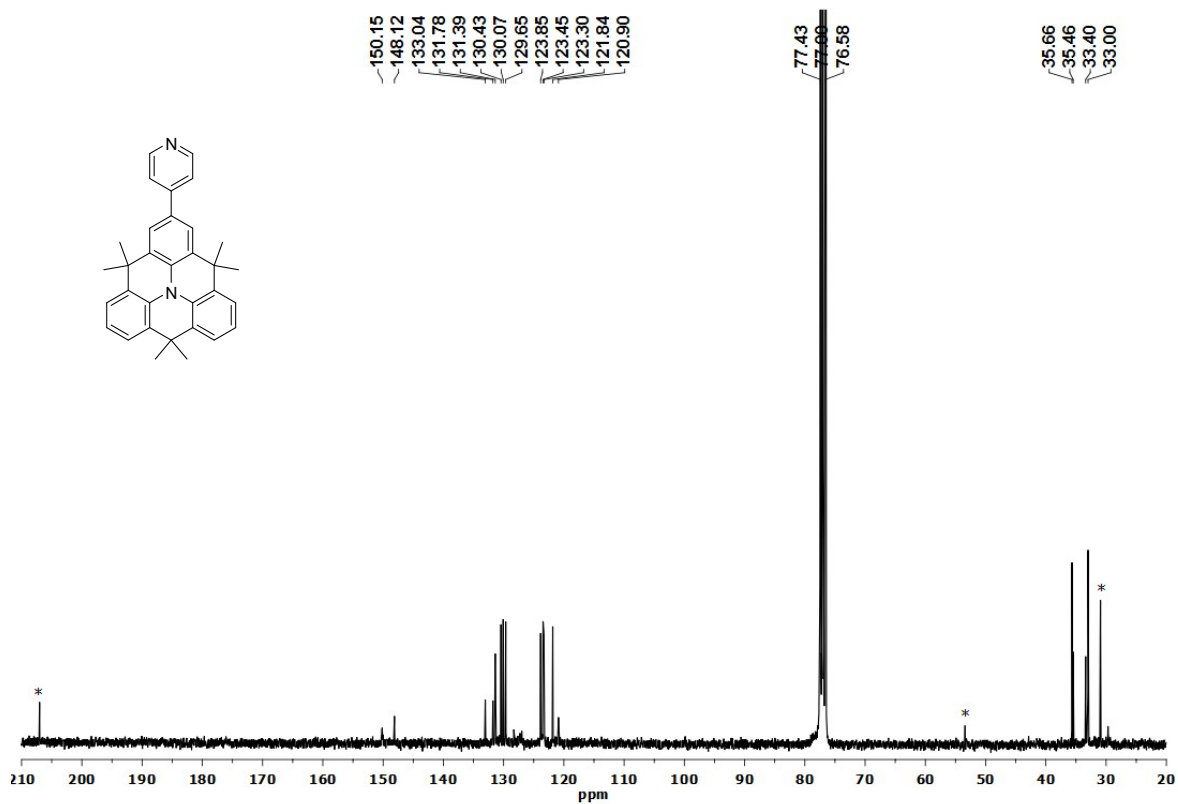

Fig.S2.  $^{13}\text{C}$  NMR spectrum of 1 (75.5 MHz,  $\text{CDCl}_3$ ); \* residual solvents:  $\text{CH}_2\text{Cl}_2$ , acetone.

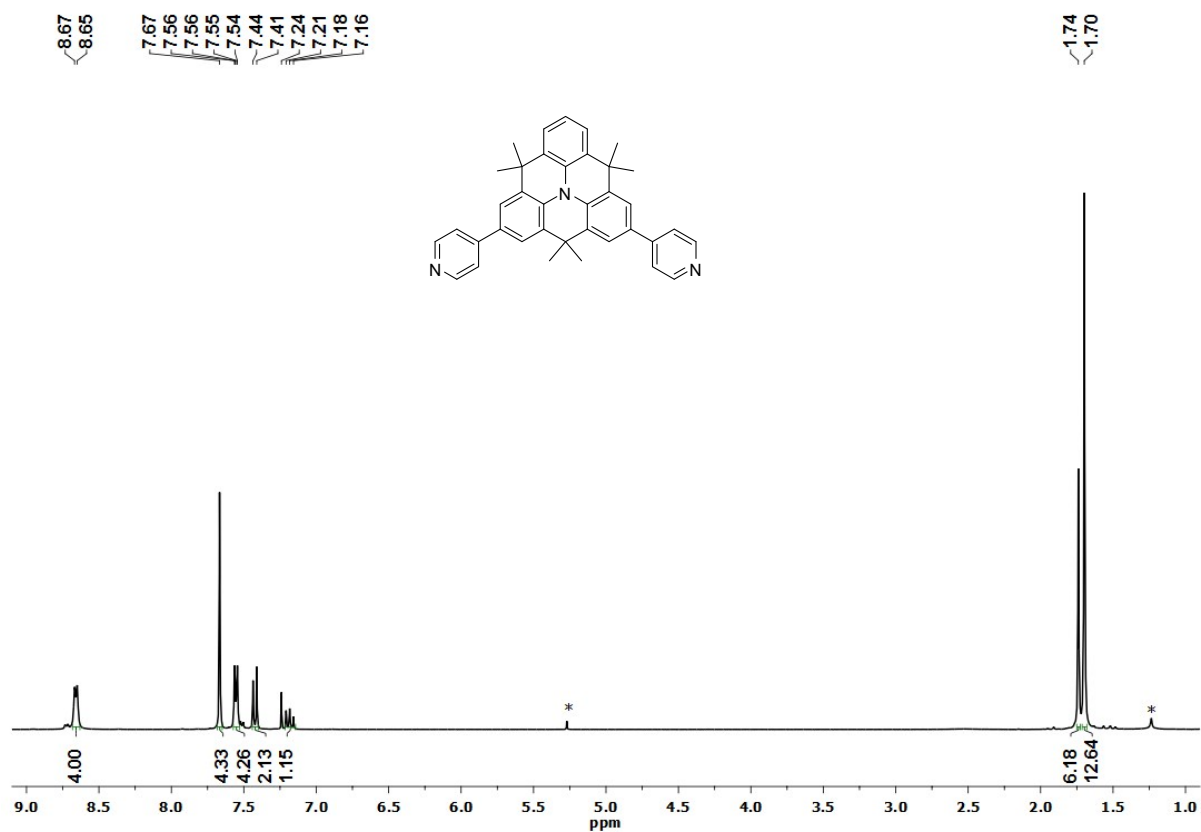

**Fig. S3.** <sup>1</sup>H NMR spectrum of **2** in (300 MHz, CDCl<sub>3</sub>); \* residual solvents: CH<sub>2</sub>Cl<sub>2</sub>, hexanes.

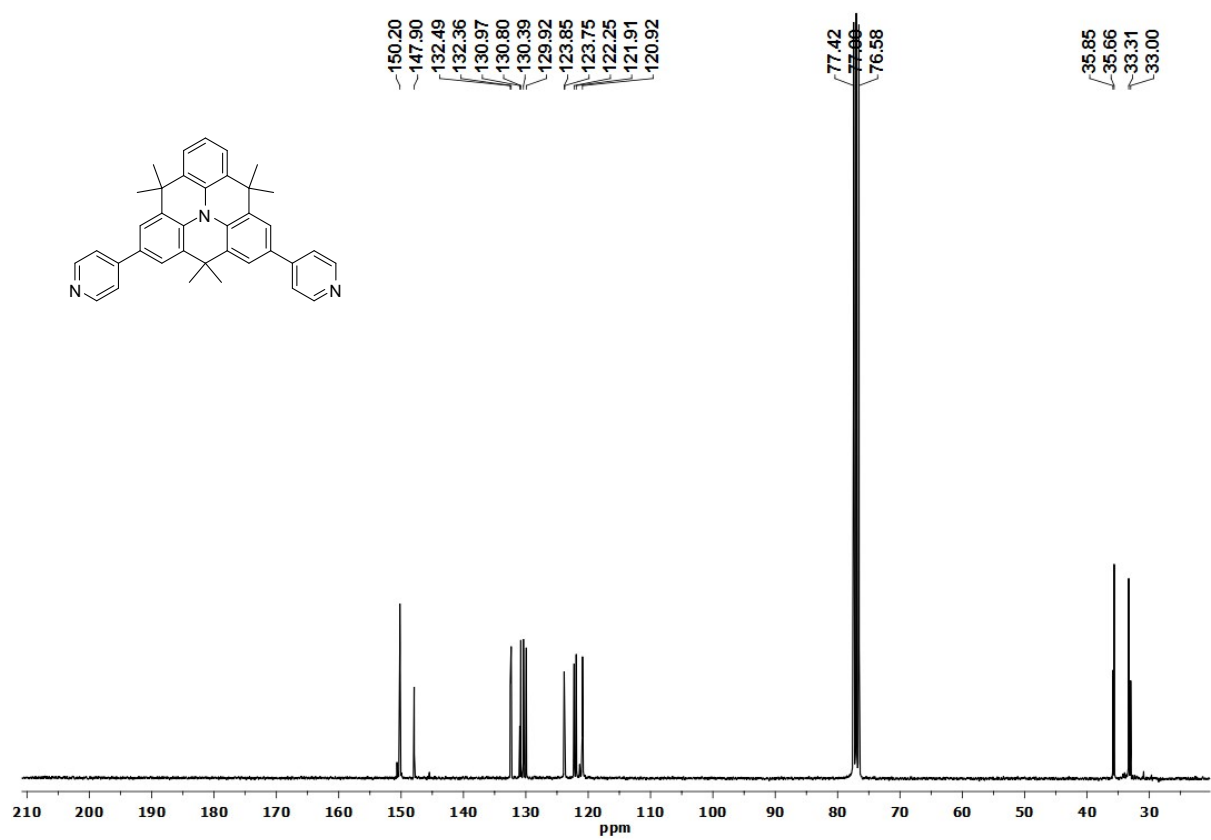

**Fig.S4.** <sup>13</sup>C NMR spectrum of **2** in (75.5 MHz, CDCl<sub>3</sub>).



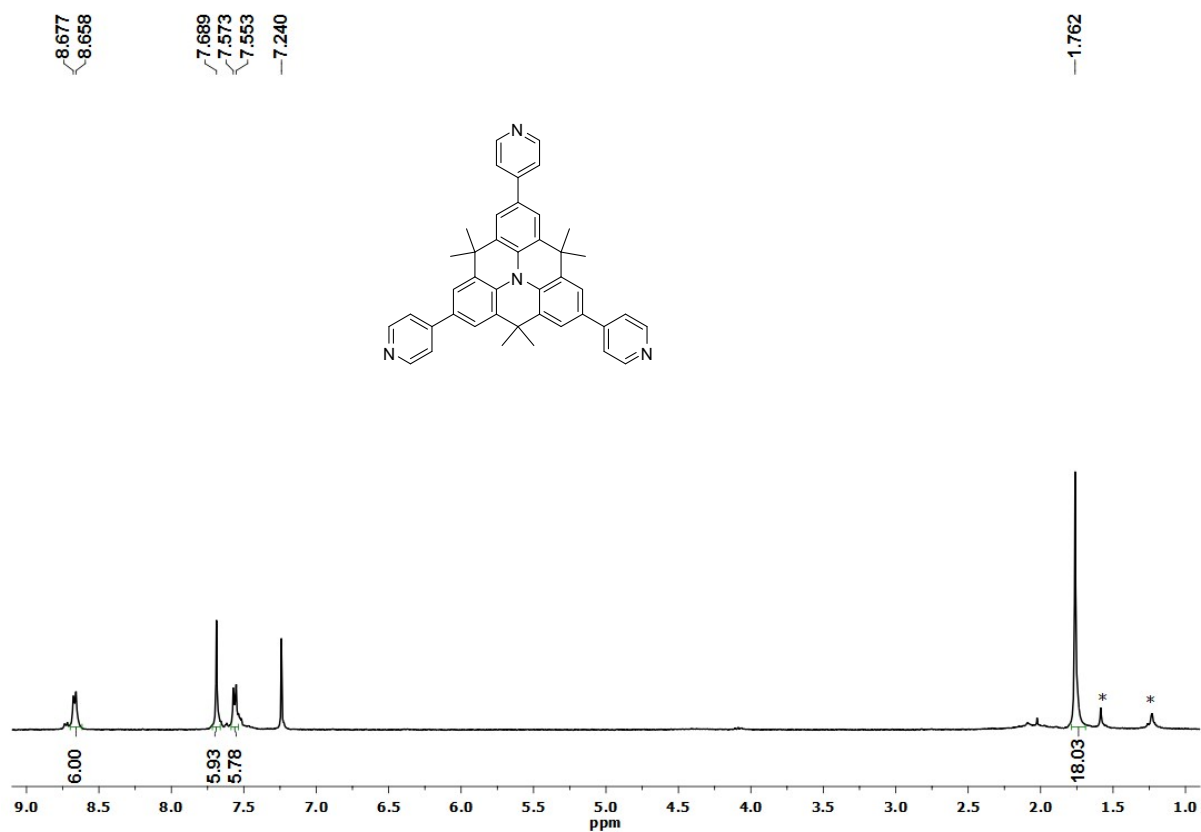

**Fig. S5.** <sup>1</sup>H NMR spectrum of **3** in (300 MHz, CDCl<sub>3</sub>); \* residual solvents: water, hexanes.

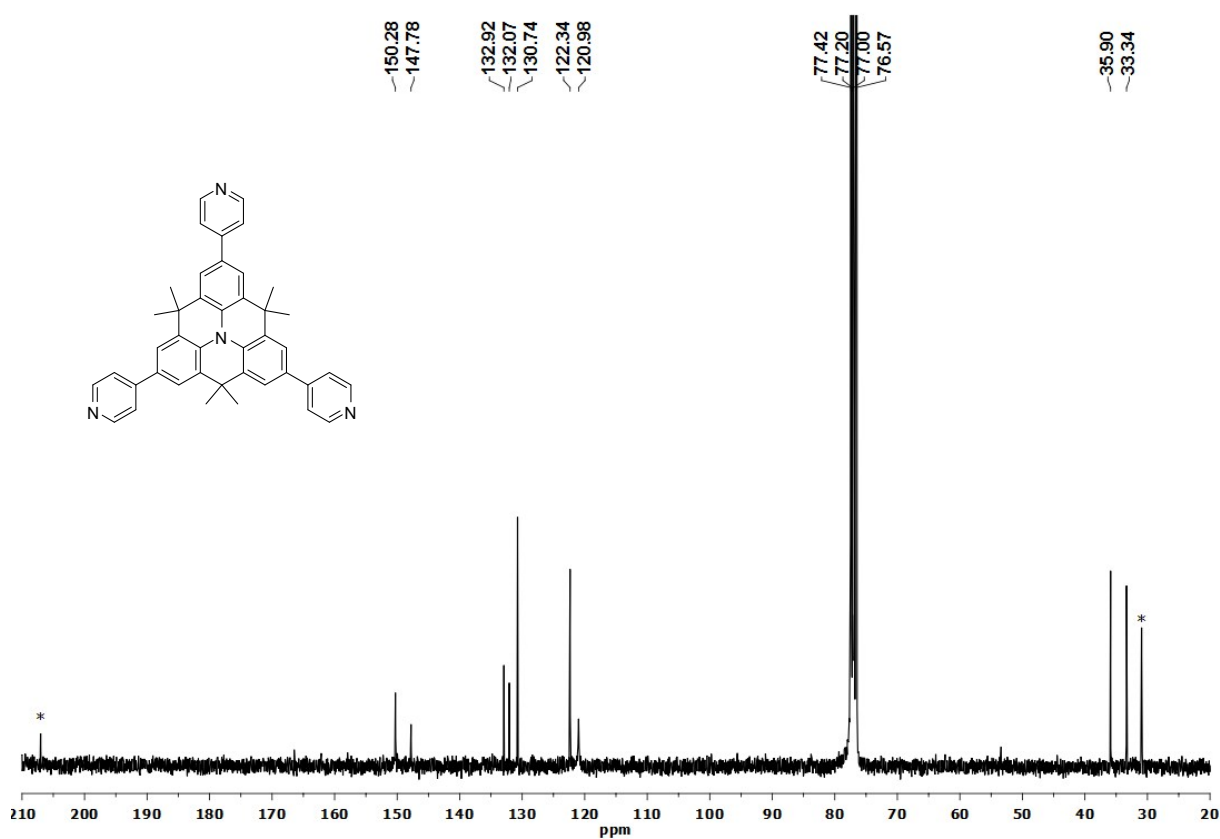

**Fig. S6.** <sup>13</sup>C NMR spectrum of **3** in (75.5 MHz, CDCl<sub>3</sub>); \* residual solvents: acetone.

### 3 X-Ray structure analysis

**General.** X-Ray crystallographic data was measured on a Supernova CCD diffractometer (Agilent) at 173 K. A suitable crystal was selected and mounted on a loop on a SuperNova, Dual, Cu at zero, Atlas diffractometer (CuK $\alpha$ ,  $\lambda = 1.5418 \text{ \AA}$ ). The crystal was kept at 173 K during data collection. Using Olex2,<sup>1</sup> the structure was solved with the ShelXS<sup>2</sup> structure solution program using direct methods and refined with the ShelXL<sup>2</sup> refinement package using least squares minimization. After full-matrix least-square refinement of the non-hydrogen atoms with anisotropic thermal parameters, the hydrogen atoms were placed in calculated positions using a riding model. These data can be obtained free of charge from the Cambridge Crystallographic Data Centre ([www.ccdc.cam.ac.uk/data\\_request/cif](http://www.ccdc.cam.ac.uk/data_request/cif)).

Single crystals of **2** suitable for X-ray crystallographic analysis were grown by slow evaporation of a solution of **2** in CH<sub>2</sub>Cl<sub>2</sub>/MeOH (1:2) at room temperature. The compound crystallizes in the monoclinic space group of P2<sub>1</sub>/c (no. 14) with one molecule of **2** in the asymmetric unit. C<sub>37</sub>H<sub>33</sub>N<sub>3</sub>,  $M_w = 519.66$ ; crystal dimensions:  $0.21 \times 0.16 \times 0.04 \text{ mm}^3$ ;  $a = 15.0018(6) \text{ \AA}$ ,  $b = 11.1825(4) \text{ \AA}$ ,  $c = 16.9177(7) \text{ \AA}$ ;  $a = \gamma = 90^\circ$ ,  $\beta = 110.262(4)^\circ$ ;  $V = 2662.46(17) \text{ \AA}^3$ ,  $T = 173.00 (10) \text{ K}$ ,  $Z = 4$ ,  $\mu(\text{Cu K}\alpha) = 0.581$ , 7256 reflections measured, 4019 unique ( $R_{\text{int}} = 0.0534$ ) which were used in all calculations. The final  $wR_2$  was 0.1517 (all data) and  $R_1$  was 0.0530 ( $>2\sigma(I)$ ). CCDC 1441546

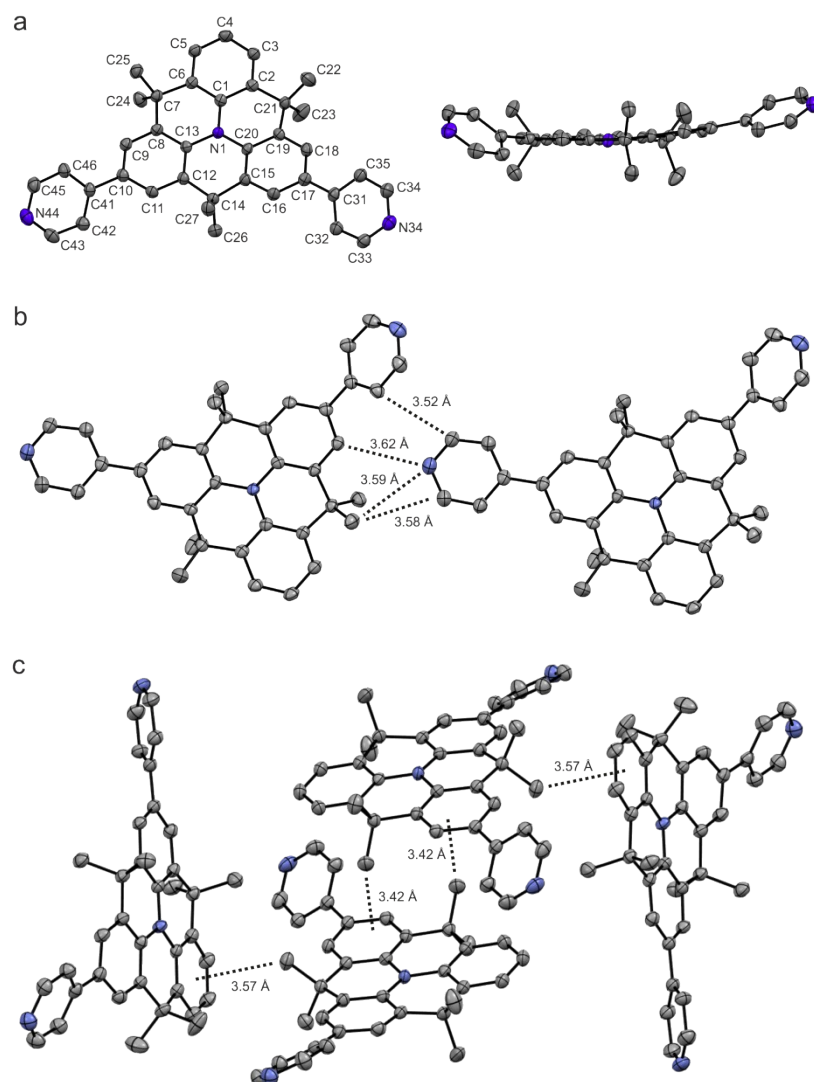

**Fig. S7.** a) Molecular structure of **2** in the solid state in top view (left) and side view (right) (50% probability level, H-atoms omitted for clarity). Selected bond lengths [Å], bond angles [°], and torsions angles [°]: C1–N1 1.424(3), C13–N1 1.424(3), C20–N1 1.427(3), C1–N1–C13 119.7(2), C1–N1–C20 119.77(19), C13–N1–C20 119.98(19), C18–C17–C31–C36 –40.7(4), C11–C10–C41–C42 27.6(4). b) and c) Illustration of the most important intermolecular interactions in the crystal packing of **2**.

## 4 UV/vis absorption and emission spectroscopy

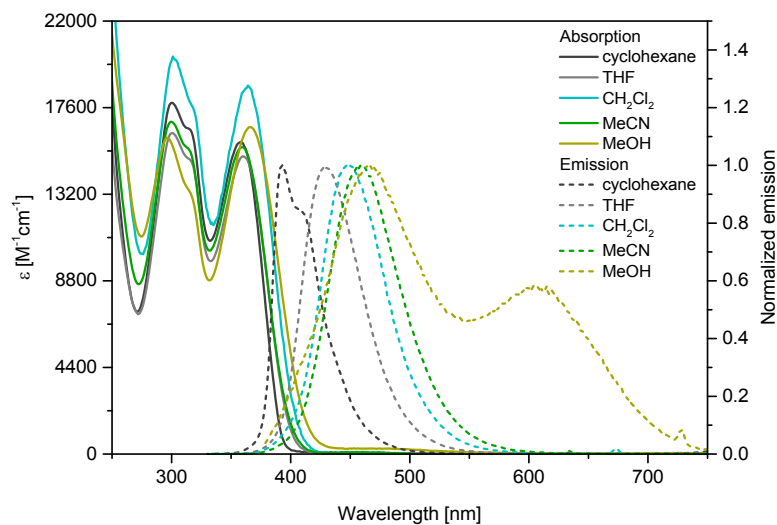

**Fig. S8.** UV/vis absorption (solid lines) and emission (dashed lines) spectra of **1** in different solvents at room temperature (cyclohexane:  $\lambda_{\text{exc}} = 315$  nm, THF:  $\lambda_{\text{exc}} = 318$  nm, CH<sub>2</sub>Cl<sub>2</sub>:  $\lambda_{\text{exc}} = 335$  nm, MeCN:  $\lambda_{\text{exc}} = 316$  nm, MeOH:  $\lambda_{\text{exc}} = 363$  nm).

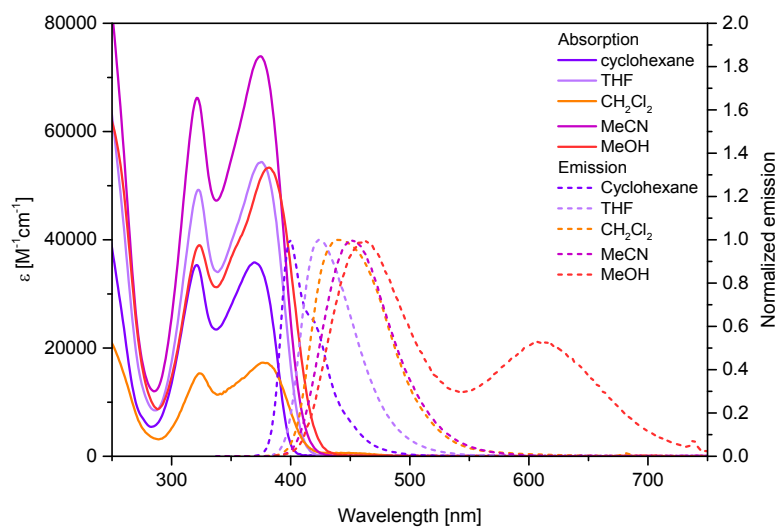

**Fig. S9.** UV/vis absorption (solid lines) and emission (dashed lines) spectra of **2** in different solvents at room temperature (cyclohexane:  $\lambda_{\text{exc}} = 321$  nm, THF:  $\lambda_{\text{exc}} = 370$  nm, CH<sub>2</sub>Cl<sub>2</sub>:  $\lambda_{\text{exc}} = 339$  nm, MeCN:  $\lambda_{\text{exc}} = 323$  nm, MeOH:  $\lambda_{\text{exc}} = 368$  nm).

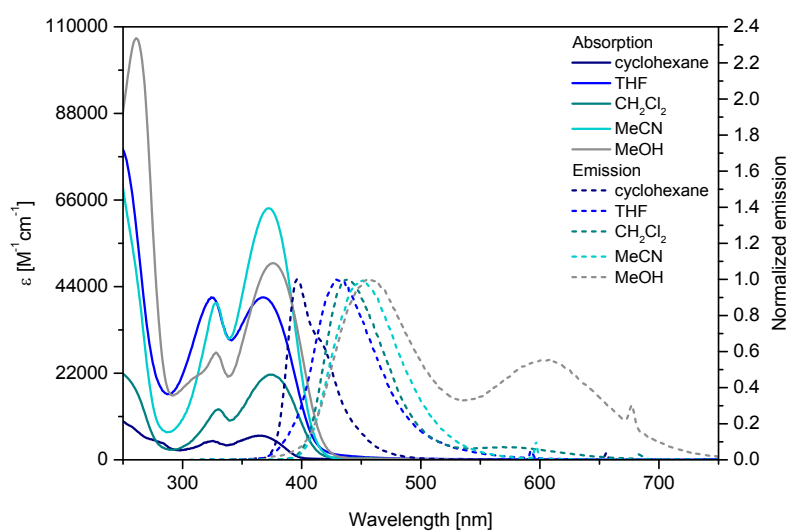

**Fig. S10.** UV/vis absorption (solid lines) and emission (dashed lines) spectra of **3** in different solvents at room temperature (cyclohexane:  $\lambda_{exc}$  = 327 nm, THF:  $\lambda_{exc}$  = 296 nm,  $CH_2Cl_2$ :  $\lambda_{exc}$  = 340 nm, MeCN:  $\lambda_{exc}$  = 298 nm, MeOH:  $\lambda_{exc}$  = 338 nm).

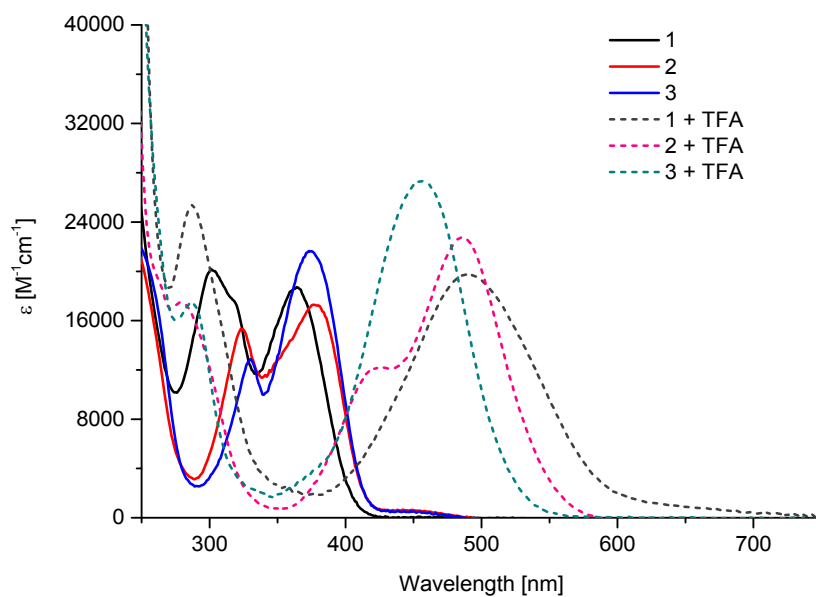

**Fig. S11.** UV/vis absorption spectra of compounds **1–3** in  $CH_2Cl_2$  recorded at room temperature neat (solid lines) and after addition of an excess of trifluoroacetic acid (TFA; dashed lines).

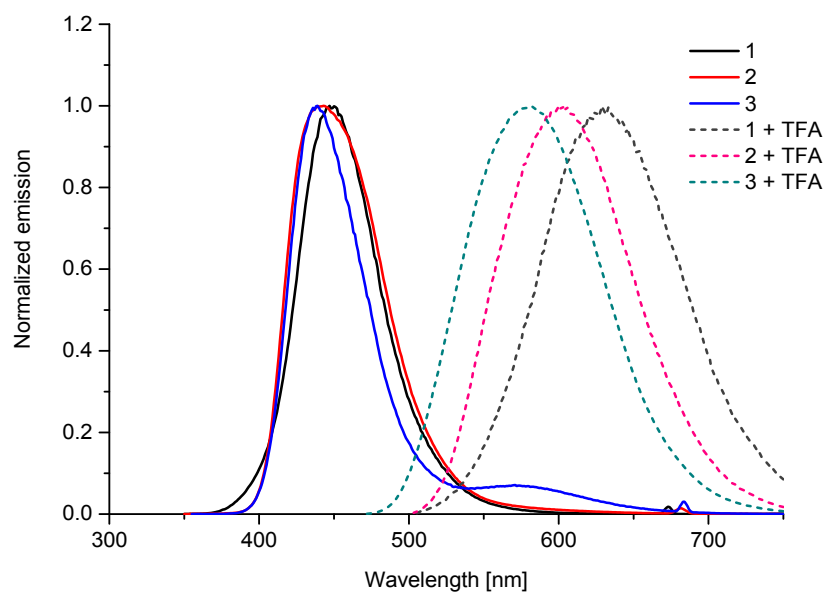

**Fig. S12.** UV/vis emission spectra of compounds **1–3** in  $\text{CH}_2\text{Cl}_2$  recorded at room temperature neat (solid lines) and after addition of an excess of trifluoroacetic acid (TFA; dashed lines). **1**:  $\lambda_{\text{exc}} = 335$  nm, **2**:  $\lambda_{\text{exc}} = 339$  nm, **3**:  $\lambda_{\text{exc}} = 340$  nm, **1+TFA**:  $\lambda_{\text{exc}} = 489$  nm, **2+TFA**:  $\lambda_{\text{exc}} = 486$  nm, **3+TFA**:  $\lambda_{\text{exc}} = 455$  nm.

## 5 Dye-sensitized solar cell fabrication and characterization

**General.** All chemicals were purchased from chemical suppliers and used without further purification.  $\text{TiCl}_4$  (0.09 M in HCl), guanidinium thiocyanate, 4-*tert*-butylpyridine, 1-butyl-3-methylimidazolium iodide, and  $\text{H}_2\text{Cl}_6\text{Pt} \times \text{H}_2\text{O}$  were purchased from Sigma-Aldrich.  $\text{TiO}_2$  paste (Ti-Nanoxide T/SP) and the sealing foil (Meltonix 1170-25) were purchased from Solaronix.

Fluorine-doped tin-oxide (FTO) substrates were sonicated for 15 min with a detergent solution, washed with deionized water, and again sonicated in isopropyl alcohol for 15 min. FTOs were immersed into a 40 mM aqueous  $\text{TiCl}_4$  solution at 70 °C for 30 min and washed with water and EtOH. Treated substrates were sintered at 450 °C for 30 min. The transparent  $\text{TiO}_2$  electrodes were prepared on FTO glass plates by using a doctor blade technique. The latter were gradually heated under air flow at 450 °C for 30 min. The thickness of  $\text{TiO}_2$ -based electrodes was 7  $\mu\text{m}$ . The electrodes were immersed at around 80 °C in solutions of **1**, **2**, or **3** in EtOH for different times.

Fluorine-doped tin-oxide (FTO) substrates were sonicated for 15 min in acetone, subsequently with detergent solution, washed with deionized water, and again sonicated in isopropyl alcohol for 15 min. The ZnO electrodes were prepared on FTO glass plates by using a doctor blade technique and a home-made paste as previously reported.<sup>3</sup> The doctor blading procedure was repeated up to 3 times to reach similar electrode thickness as those in  $\text{TiO}_2$  electrodes. The ZnO films were gradually heated under air flow up to 500 °C for 30 min. The electrodes were finally immersed at around 80 °C in an EtOH based dye solution ( $4 \times 10^{-4}$  M) for different times. Please notice that, although an extensive family of chemicals were tested to desorb the dyes, *e.g.*, 0.1, 0.5, 1.0 M NaOH in  $\text{H}_2\text{O}$ , 1:1, 2:1 and 1:2 mixtures of 1 M NaOH and EtOH, 16.5% and 37% HCl in  $\text{H}_2\text{O}$  at room temperature as well as at 40 °C, conc.  $\text{CH}_3\text{COOH}$ , conc.  $\text{CF}_3\text{COOH}$ , no dye desorption could be achieved. We also used chenodeoxycholic acid (CDCA) as additive to avoid the formation of aggregates on the electrode surface, but independently of the molar concentrations (1:0.5, 1:1, 1:2, 1:4, 1:10 dye : CDCA) no dye adsorption was observed up to immersion times superior to 100 h.

For preparation of the counter-electrodes two holes (0.1 mm) were drilled into FTOs *via* sandblasting prior to the cleaning procedure (*vide supra*). FTOs were coated with a thin film of chloroplatinic solution (4.88 mM) in isopropyl alcohol. Thereby, always the same amount of chloroplatinic solution (26  $\mu\text{L}$ ) was used to assure the same coverage of the FTO. Then, the

slides were annealed to 390 °C for 15 min. For every measurement counter-electrodes were freshly prepared to assure reproducible results.

The photoanodes and the counter-electrodes were assembled into a sealed sandwich-type cell by heating at 130 °C with a controlled pressure using a hot-melt ionomer film (Surlyn). A solution of 0.6 M 1-butyl-3-methylimidazolium iodide 99%, 0.03 M iodine double sublimed, 0.1 M guanidine thiocyanate  $\geq 99.0\%$ , and 0.5 M 4-*tert*-butylpyridine 96% in a solvent mixture of acetonitrile and valeronitrile (85:15 v/v) was employed as electrolyte. The electrolyte was introduced through the aforementioned holes and the final cell was sealed immediately afterwards using another piece of Surlyn and a piece of microscope slide.

The photocurrent measurements were performed using a 150 W lamp (Xenon lamp, calibrated to 1000 W m<sup>-2</sup> under AM 1.5G conditions with a Si-Reference cell (Oriol SRC-1000-TC-K-KG5-N). Current-voltage measurements were measured by using a potentiostat/galvanostat (PGSTAT30N, Autolab equipped with a frequency response analyzer module – FRA) in the range of -0.9 to 0.2 V. DSSCs were measured by using a shading mask with an aperture size according to the literature.<sup>4</sup> Incident photon-to-current efficiency (IPCE) spectra were measured by using Newport apparatus model 70104. For alpha-step thickness measurements of TiO<sub>2</sub>- and ZnO-based electrodes, a Dektak XT profilometer from Bruker was utilized.

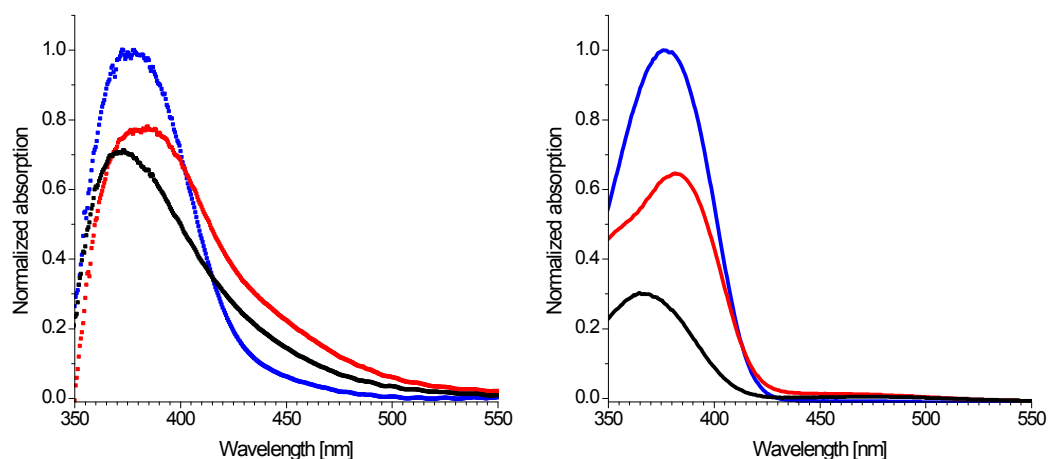

**Fig. S13.** UV/vis absorption spectra of **1** (black), **2** (red), and **3** (blue) adsorbed on transparent TiO<sub>2</sub> electrodes (left) and in EtOH solution (right).



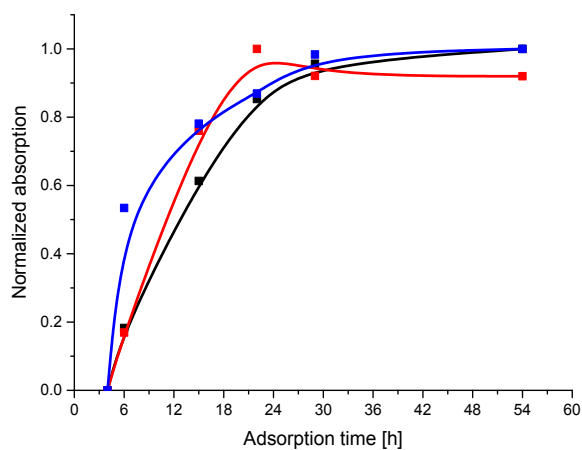

**Fig. S14.** Adsorption kinetics at 375 nm of **1** (black), **2** (red), and **3** (blue) on transparent TiO<sub>2</sub> electrodes.

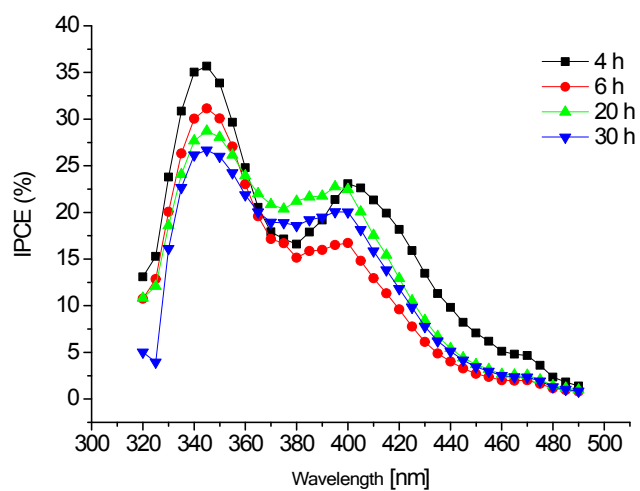

**Fig. S15.** IPCE spectra of TiO<sub>2</sub>-based DSSCs with **1** at different adsorption times.

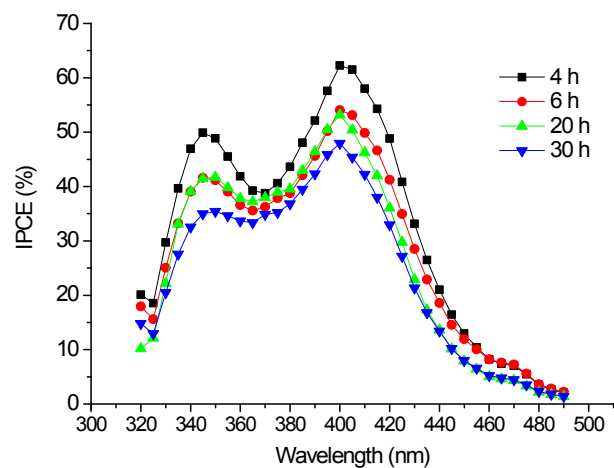

**Fig. S16.** IPCE spectra of  $\text{TiO}_2$ -based DSSCs with **3** at different adsorption times

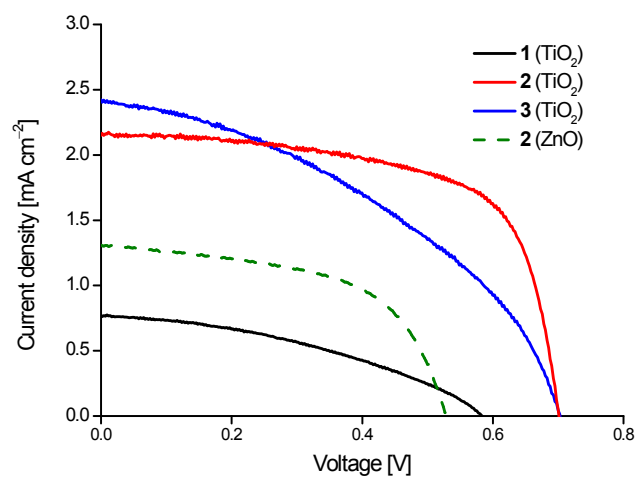

**Fig. S17.** J-V curves of  $\text{TiO}_2$ -based DSSCs (solid line) with **1** (22 h immersion time), **2** (30 h), and **3** (4 h) and J-V curve of ZnO-based DSSCs (dotted line) with **2** at 170 h immersion time.

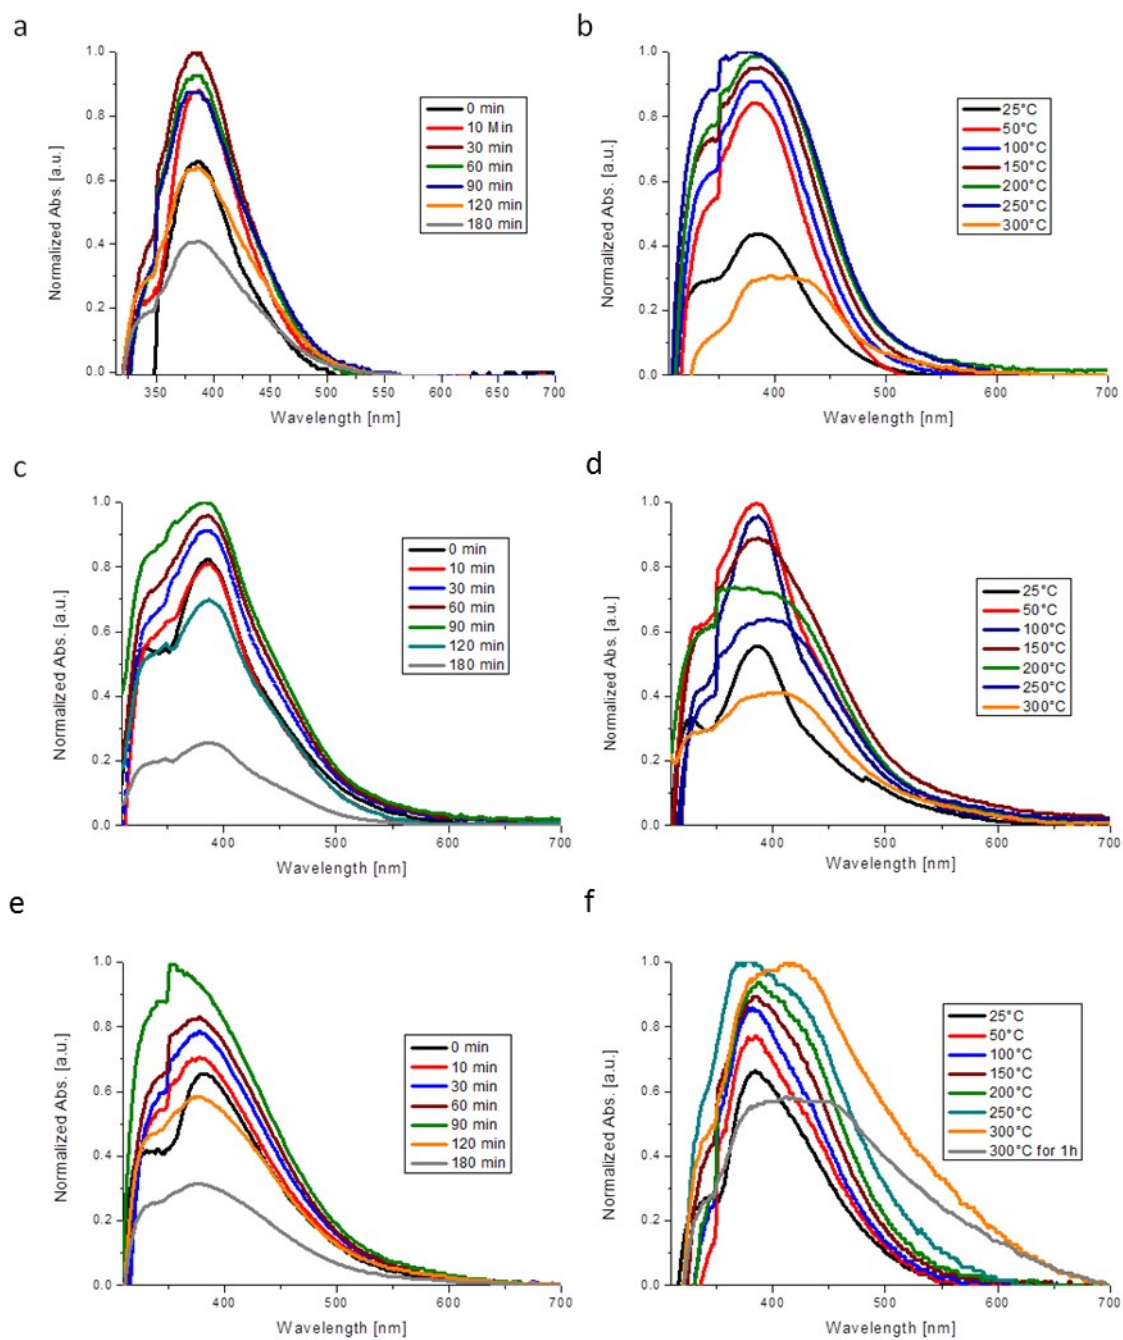

**Fig. S18.** Irradiation stability (left) under 1 sun illumination and thermal stability (right) of **1** (top, a and b, respectively), **2** (middle, c and d, respectively), and **3** (bottom, e and f, respectively) attached to a TiO<sub>2</sub> electrode measured by UV/vis absorption spectroscopy. For thermal stability studies, the sensitized electrodes were kept at the respective temperature for 30 minutes for each step.

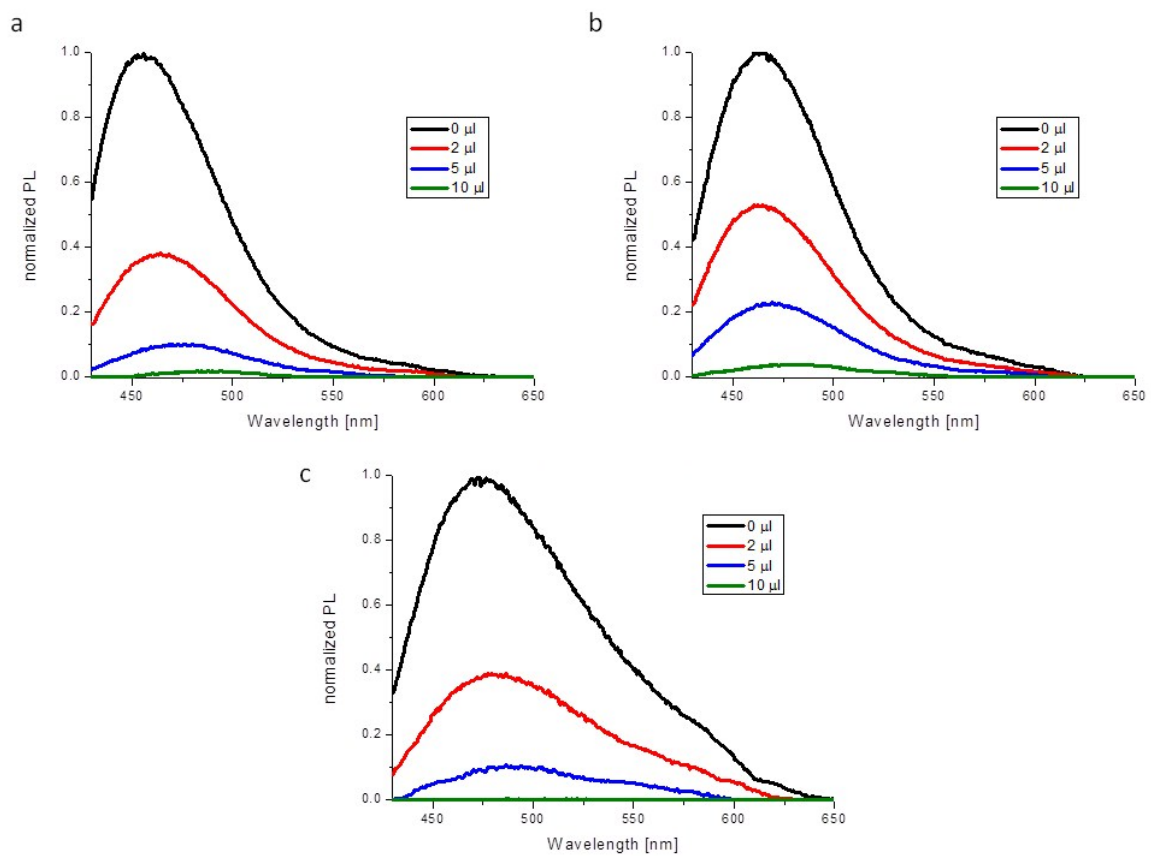

**Fig. S19.** Emission spectra of **1** (a), **2** (b) and **3** (c) in EtOH solution upon stepwise electrolyte addition.

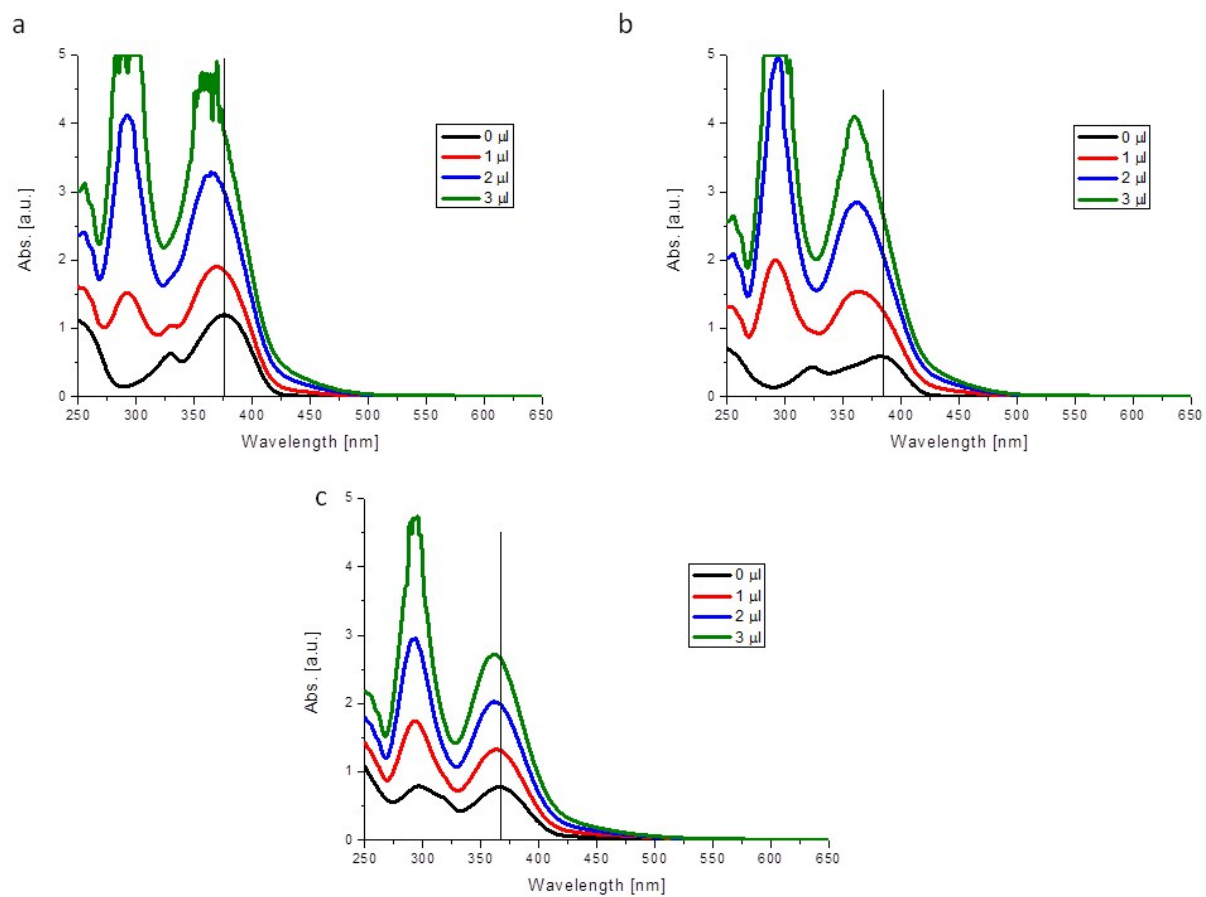

**Fig. S20.** UV/vis absorption spectra of **1** (a), **2** (b) and **3** (c) in EtOH solution upon stepwise electrolyte addition.

## 6 Frontier molecular orbital analysis

Calculations were performed with the Gaussian 09 program suite.<sup>5</sup> Full geometry optimizations without symmetry constraints were performed at  $\omega$ B97XD<sup>6</sup>/6-31G(d).<sup>7-18</sup> Normal vibrational modes within the harmonic approximation were calculated to characterize minima at the same level of theory. Orbital energies were calculated at OLYP<sup>19-22</sup>/6-311+G(d,p)<sup>11-17,23-27</sup> on  $\omega$ B97XD/6-31G(d) geometries. Structures and orbitals were visualized with Chemcraft 1.7.<sup>28</sup> Cartesian coordinates and archives of the Gaussian 09 calculations are given below.

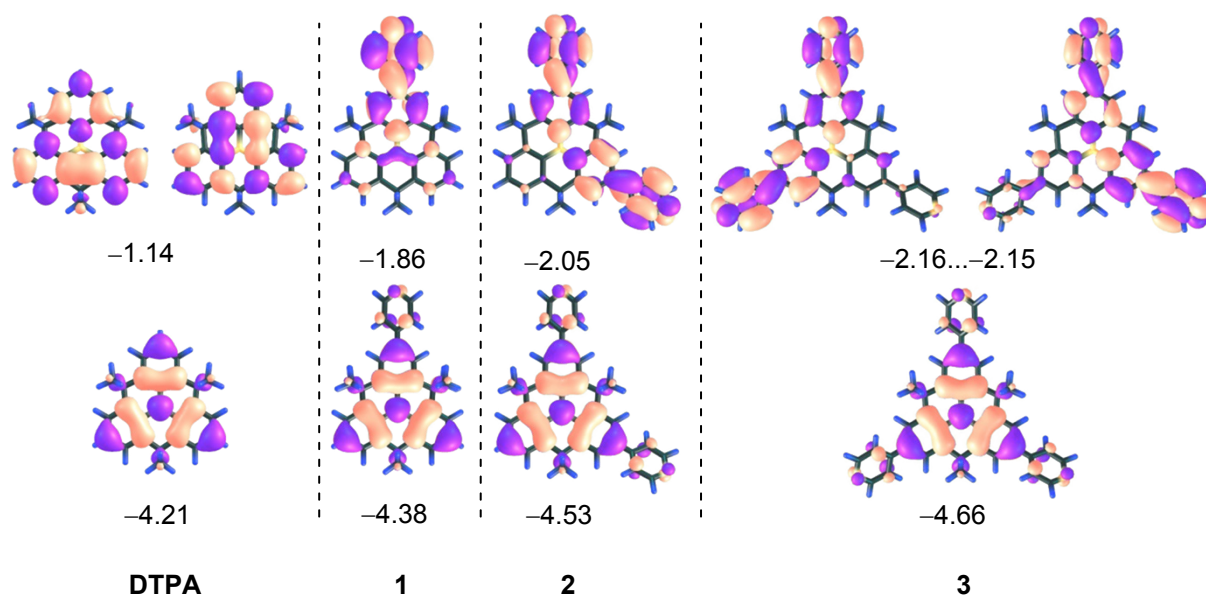

**Fig. S21.** Frontier molecular orbitals for **DTPA** and **1–3** [eV] calculated at the OLYP/6-311+G(d,p)// $\omega$ B97XD/6-31G(d) level of theory. HOMOs in bottom row, LUMOs in top row.

## 6.1 DTPA

### 6.1.1 ωB97XD/6-31G(d)

55

|   |           |           |           |
|---|-----------|-----------|-----------|
| C | -2.976850 | 0.000000  | 0.007858  |
| C | -2.118243 | -1.251143 | 0.008288  |
| C | -0.709141 | -1.229064 | 0.008458  |
| N | 0.000725  | 0.000000  | 0.008310  |
| C | -0.709141 | 1.229064  | 0.008458  |
| C | -2.118243 | 1.251143  | 0.008288  |
| C | 1.420432  | 0.000000  | 0.008087  |
| C | 2.143721  | 1.209383  | 0.007981  |
| C | 1.489344  | 2.578131  | 0.008441  |
| C | -0.023693 | 2.459941  | 0.008793  |
| C | -0.023693 | -2.459941 | 0.008793  |
| C | 1.489344  | -2.578131 | 0.008441  |
| C | 2.143721  | -1.209383 | 0.007981  |
| C | -0.743550 | 3.653371  | 0.009163  |
| C | -2.124239 | 3.680329  | 0.008967  |
| C | -2.791578 | 2.471393  | 0.008448  |
| C | -2.791578 | -2.471393 | 0.008448  |
| C | -2.124239 | -3.680329 | 0.008967  |
| C | -0.743550 | -3.653371 | 0.009163  |
| C | 3.537278  | -1.182508 | 0.007556  |
| C | 4.250465  | 0.000000  | 0.007287  |
| C | 3.537278  | 1.182508  | 0.007556  |
| C | 1.931144  | 3.347952  | -1.258898 |
| C | 1.931968  | 3.347392  | 1.275818  |
| C | 1.931144  | -3.347952 | -1.258898 |
| C | 1.931968  | -3.347392 | 1.275818  |
| C | -3.863787 | 0.000000  | -1.260117 |
| C | -3.864968 | 0.000000  | 1.274991  |
| H | -0.201852 | 4.593437  | 0.009533  |
| H | -3.876648 | 2.472547  | 0.008131  |
| H | -3.876648 | -2.472547 | 0.008131  |
| H | -0.201852 | -4.593437 | 0.009533  |
| H | 4.080295  | -2.121804 | 0.007478  |
| H | 4.080295  | 2.121804  | 0.007478  |
| H | 1.625622  | 2.805206  | -2.158673 |
| H | 1.482409  | 4.344930  | -1.294334 |
| H | 3.017374  | 3.474579  | -1.289881 |
| H | 3.018218  | 3.474010  | 1.306077  |
| H | 1.483281  | 4.344362  | 1.312025  |
| H | 1.627083  | 2.804225  | 2.175554  |
| H | 1.625622  | -2.805206 | -2.158673 |
| H | 3.017374  | -3.474579 | -1.289881 |
| H | 1.482409  | -4.344930 | -1.294334 |
| H | 1.483281  | -4.344362 | 1.312025  |
| H | 3.018218  | -3.474010 | 1.306077  |
| H | 1.627083  | -2.804225 | 2.175554  |
| H | -3.240625 | 0.000000  | -2.159724 |
| H | -4.510241 | -0.881985 | -1.293010 |
| H | -4.510241 | 0.881985  | -1.293010 |
| H | -4.511532 | 0.881919  | 1.307352  |
| H | -4.511532 | -0.881919 | 1.307352  |
| H | -3.242658 | 0.000000  | 2.175188  |
| H | -2.666189 | -4.620348 | 0.009169  |
| H | 5.335602  | 0.000000  | 0.006898  |
| H | -2.666189 | 4.620348  | 0.009169  |

|                                              |              |
|----------------------------------------------|--------------|
| Zero-point correction=                       | 0.477029     |
| (Hartree/Particle)                           |              |
| Thermal correction to Energy=                | 0.499602     |
| Thermal correction to Enthalpy=              | 0.500546     |
| Thermal correction to Gibbs Free Energy=     | 0.428295     |
| Sum of electronic and zero-point Energies=   | -1099.122221 |
| Sum of electronic and thermal Energies=      | -1099.099648 |
| Sum of electronic and thermal Enthalpies=    | -1099.098704 |
| Sum of electronic and thermal Free Energies= | -1099.170955 |

```

1\1\GINC-XE29TH8\Freq\RwB97XD\6-31G(d)\C27H27N1\DRAL\01-Apr-2015\0\#P
  Geom=AllCheck Guess=TCheck SCRF=Check GenChk RwB97XD/6-31G(d) Freq\1
\0,1\C,-2.9768496376,0.,0.0078584277\C,-2.1182432601,-1.2511426776,0.
0082880637\C,-0.7091410097,-1.2290644564,0.0084576751\N,0.0007245103,0
.,0.008309703\C,-0.7091410097,1.2290644564,0.0084576749\C,-2.118243260
1,1.2511426776,0.0082880634\C,1.4204317726,0.,0.008087431\C,2.14372139
37,1.209382506,0.0079810215\C,1.4893440703,2.5781311219,0.0084414058\C
,-0.0236927562,2.4599412528,0.0087930689\C,-0.0236927562,-2.4599412528
,0.0087930691\C,1.4893440703,-2.5781311219,0.0084414059\C,2.1437213937
,-1.209382506,0.0079810216\C,-0.7435495239,3.6533714306,0.0091632686\C
,-2.1242388112,3.6803286918,0.0089665636\C,-2.7915782788,2.4713931696,
0.0084479012\C,-2.7915782788,-2.4713931696,0.0084479009\C,-2.124238811
1,-3.6803286918,0.0089665631\C,-0.7435495239,-3.6533714307,0.009163268
5\C,3.5372778663,-1.1825084239,0.0075559735\C,4.2504648834,0.,0.007287
0869\C,3.5372778663,1.1825084239,0.0075559735\C,1.9311437308,3.3479518
142,-1.2588981015\C,1.9319682417,3.3473918249,1.2758176935\C,1.9311437
307,-3.3479518142,-1.2588981014\C,1.9319682419,-3.3473918249,1.2758176
936\C,-3.8637874195,-0.0000000005,-1.2601165384\C,-3.8649679655,0.0000
000006,1.2749905808\H,-0.2018517254,4.5934365069,0.0095333414\H,-3.876
6480885,2.4725468915,0.0081312805\H,-3.8766480885,-2.4725468915,0.0081
312797\H,-0.2018517254,-4.5934365069,0.009533341\H,4.0802951749,-2.121
8037218,0.0074782737\H,4.0802951749,2.1218037218,0.0074782735\H,1.6256
224958,2.8052055819,-2.1586727147\H,1.4824089626,4.3449300813,-1.29433
4162\H,3.0173736544,3.4745787712,-1.2898805996\H,3.0182184076,3.474010
4661,1.3060770769\H,1.4832806071,4.3443621333,1.3120247201\H,1.6270834
41,2.8042245921,2.1755540366\H,1.6256224957,-2.8052055819,-2.158672714
6\H,3.0173736543,-3.4745787713,-1.2898805995\H,1.4824089624,-4.3449300
813,-1.2943341619\H,1.4832806073,-4.3443621333,1.3120247202\H,3.018218
4077,-3.474010466,1.3060770769\H,1.6270834411,-2.8042245921,2.17555403
67\H,-3.2406250351,-0.0000000003,-2.1597243667\H,-4.5102409095,-0.8819
853506,-1.2930103614\H,-4.5102409102,0.881985349,-1.2930103616\H,-4.51
15319735,0.8819189283,1.3073518748\H,-4.5115319747,-0.8819189264,1.307
3518747\H,-3.2426582495,-0.0000000001,2.175187655\H,-2.6661891668,-4.6
203475331,0.0091690632\H,5.3356020632,0.,0.0068983606\H,-2.6661891669,
4.620347533,0.0091690641\Version=ES64L-G09RevD.01\HF=-1099.5992501\RM
SD=3.543e-09\RMSF=5.054e-06\ZeroPoint=0.477029\Thermal=0.4996016\Dipol
e=-0.0005227,0.,-0.0001213\DipoleDeriv=0.1392512,0.0000031,-0.0000283,
-0.0000023,0.204354,-0.0000007,-0.0001651,0.0000017,0.2135183,-0.14072
47,-0.3899749,0.0000936,-0.163024,-0.0446108,-0.0000339,0.0000842,-0.0
000309,-0.1135598,0.2644198,0.7927714,-0.0000274,0.7926832,1.1802701,-
0.0000769,-0.0000433,-0.0000512,0.0755585,-1.6351346,0.0000003,0.00024
26,-0.0000054,-1.6393246,-0.0000272,0.000358,0.0000021,-0.1516622,0.26
44147,-0.7927744,-0.0000313,-0.7926665,1.1802642,0.0001201,-0.0000429,
0.0000522,0.0755728,-0.1407113,0.3899638,0.0000962,0.1630328,-0.044611
2,0.0000386,0.0000839,0.0000272,-0.1135662,1.6346634,0.0000083,-0.0002
287,0.0000035,-0.1923983,0.0000172,-0.0000664,0.0000009,0.0750359,-0.3
088658,-0.0658204,-0.0000065,-0.2928002,0.1230222,0.0000902,-0.0000425
,0.0001111,-0.1131256,0.1872641,-0.0291154,0.0000497,-0.0270345,0.1543
364,-0.0000177,0.000036,0.0000089,0.2139608,0.1720343,-0.0148187,-0.00
01181,0.2119793,-0.3561065,-0.0000083,-0.0002064,-0.0000765,-0.1142519
,0.172052,0.0148279,-0.0001106,-0.2119887,-0.3561203,-0.000012,-0.0002

```



059,0.000074,-0.1142436,0.1872575,0.0291149,0.0000369,0.0270385,0.1543  
296,-0.0000175,0.0000344,-0.0000079,0.2139467,-0.3088646,0.0658096,0.0  
000083,0.2927993,0.1230389,-0.0000896,-0.0000427,-0.0001126,-0.1131176  
,0.0271193,0.0560461,0.0000377,-0.017291,0.0686721,0.0000313,0.0000303  
,0.0000899,-0.1151444,-0.1145163,-0.0758548,-0.0000288,-0.0763321,-0.0  
254189,0.0000431,-0.0000447,0.0000285,-0.1373603,0.0820282,-0.0415687,  
0.0000681,0.0309213,0.0230293,0.0000643,0.0001288,0.0000239,-0.1137101  
,0.0820267,0.0415644,0.0000548,-0.0309232,0.0230265,-0.0000675,0.00012  
86,-0.000027,-0.1137119,-0.1145187,0.0758535,-0.0000231,0.0763268,-0.0  
254113,-0.0000273,-0.0000445,-0.0000338,-0.1373622,0.0271171,-0.056046  
9,0.0000562,0.0172887,0.0686816,-0.0000357,0.0000303,-0.0000942,-0.115  
1493,0.0410127,0.0079893,-0.0000436,-0.068223,0.0574782,-0.0000157,0.0  
000335,-0.0000117,-0.1141957,0.0209089,-0.0000014,-0.0000782,-0.000000  
1,-0.1582257,0.0000368,-0.0001155,-0.0000017,-0.1377204,0.0410061,-0.0  
079925,-0.000013,0.068213,0.0574776,-0.0000118,0.0000325,0.0000078,-0.  
1141923,0.0006535,-0.0226581,0.0110394,-0.022957,-0.0251337,0.0162262,  
-0.0130172,-0.0209499,0.009492,0.0006063,-0.0225835,-0.0111123,-0.0229  
655,-0.0251397,-0.0162124,0.0129347,0.0209487,0.0095065,0.0006622,0.02  
26557,0.0110607,0.0229567,-0.0251279,-0.0162267,-0.0130074,0.020952,0.  
0095208,0.0006071,0.0225759,-0.0111344,0.0229644,-0.0251359,0.0162381,  
0.0129313,-0.0209394,0.0095313,-0.0395852,-0.0000045,-0.019919,-0.0000  
043,0.0155444,-0.0000134,0.0244271,0.0000002,0.0087444,-0.0395668,-0.0  
000067,0.0199147,-0.0000035,0.0155729,0.000005,-0.0245152,-0.0000002,0  
.0088267,0.0268974,-0.1120864,-0.0000525,-0.0858128,-0.0551765,-0.0000  
347,-0.0000478,-0.000042,0.1033017,-0.121675,0.0011789,-0.0000709,-0.0  
236895,0.0979559,-0.0000522,-0.0001363,-0.0000605,0.1052303,-0.1216759  
, -0.0011726,-0.0000605,0.0236893,0.0979566,0.0000551,-0.000136,0.00006  
33,0.105234,0.0268989,0.1120906,-0.0000553,0.0858109,-0.0551834,0.0000  
403,-0.000048,0.0000465,0.1033039,0.0497168,0.0731842,0.0000214,0.1008  
923,-0.0777967,-0.0000095,0.0000361,0.0000457,0.1044247,0.0497207,-0.0  
731805,0.0000255,-0.1008839,-0.0777944,0.0000065,0.0000362,-0.0000432,  
0.1044217,0.0522023,-0.0191898,-0.0495865,-0.0184213,0.0296556,-0.0876  
642,-0.0279711,-0.0502444,-0.083154,0.0503201,0.1144938,-0.0096046,0.0  
717751,-0.1384209,0.0309867,-0.0008782,0.0043292,0.0449117,-0.170651,-  
0.058322,0.030145,-0.0175556,0.0802751,0.0096593,0.003997,0.0043401,0.  
0424333,-0.1706038,-0.0583357,-0.0300441,-0.0175868,0.0803335,-0.00962  
2,-0.003869,-0.0042287,0.0424469,0.0505453,0.114499,0.0097218,0.071723  
4,-0.1384538,-0.0311174,0.0010185,-0.0044899,0.0449428,0.052254,-0.019  
1775,0.0494818,-0.0183809,0.0296079,0.08774,0.0278618,0.0503031,-0.083  
1574,0.0522007,0.0191912,-0.0495897,0.0184243,0.029656,0.0876718,-0.02  
79808,0.0502447,-0.0831688,-0.1706584,0.0583215,0.0301312,0.0175548,0.  
0802753,-0.0096605,0.0039972,-0.0043401,0.0424306,0.0503202,-0.114494,  
-0.0096067,-0.0717782,-0.1384242,-0.0309865,-0.0008784,-0.0043294,0.04  
49092,0.0505468,-0.1144987,0.0097234,-0.0717244,-0.138454,0.0311175,0.  
0010184,0.004489,0.0449396,-0.1706071,0.0583393,-0.0300321,0.0175861,0  
.0803336,0.0096205,-0.0038696,0.0042272,0.042445,0.0522544,0.0191803,0  
.049488,0.018382,0.0296042,-0.0877558,0.0278667,-0.0503094,-0.0831797,  
0.0194977,0.0000014,0.1011636,0.0000015,0.0632205,0.0000032,0.0578979,  
-0.0000003,-0.0818389,-0.0139761,-0.1053051,-0.0236358,-0.1456651,-0.0  
818297,-0.0205156,-0.0068778,0.0016571,0.0423254,-0.0139758,0.105309,-  
0.0236382,0.1456669,-0.081832,0.0205247,-0.0068775,-0.0016576,0.042324  
5,-0.0140344,0.1053279,0.023597,0.1455677,-0.0819055,-0.0203588,0.0069  
352,0.0017834,0.0422946,-0.0140353,-0.1053239,0.0235904,-0.1455665,-0.  
0819006,0.0203517,0.0069355,-0.0017835,0.0422957,0.0196472,0.0000016,-  
0.1010634,0.0000014,0.0632201,0.0000018,-0.057807,0.000001,-0.0820122,  
0.0078226,-0.0836316,0.0000018,-0.0841179,-0.089016,0.0000417,-0.00001  
7,0.0000667,0.1201914,-0.1393912,0.0000049,0.0000766,0.0000001,0.05677  
22,-0.0000004,0.0000964,0.0000016,0.1203731,0.007821,0.0836311,0.00001  
7,0.0841208,-0.0890127,-0.0000598,-0.0000166,-0.0000614,0.1201889\Pol  
ar=343.6838872,0.0001493,343.2865388,-0.0083556,0.000043,146.7046794\PG  
=CS [SG(C5H3N1),X(C22H24)]\NImag=0\0.49491322,-0.00000017,0.55315858,

## 6.1.2 OLYP/6-311+G(d,p)

```
1\1\GINC-XE29TH8\SP\ROLYP\6-311+G(d,p)\C27H27N1\DRAL\02-Apr-2015\0\#P
OLYP/6-311+G(d,p) SCF=Tight SCFCyc=1200 Name=Dral Pop=(Full,NBO) GFIN
PUT GFPRINT Density=Current\1\0,1\C,0,-2.97685,0.,0.007858\C,0,-2.11
8243,-1.251143,0.008288\C,0,-0.709141,-1.229064,0.008458\N,0,0.000725,
0.,0.00831\C,0,-0.709141,1.229064,0.008458\C,0,-2.118243,1.251143,0.00
8288\C,0,1.420432,0.,0.008087\C,0,2.143721,1.209383,0.007981\C,0,1.489
344,2.578131,0.008441\C,0,-0.023693,2.459941,0.008793\C,0,-0.023693,-2
.459941,0.008793\C,0,1.489344,-2.578131,0.008441\C,0,2.143721,-1.20938
3,0.007981\C,0,-0.74355,3.653371,0.009163\C,0,-2.124239,3.680329,0.008
967\C,0,-2.791578,2.471393,0.008448\C,0,-2.791578,-2.471393,0.008448\C
,0,-2.124239,-3.680329,0.008967\C,0,-0.74355,-3.653371,0.009163\C,0,3.
537278,-1.182508,0.007556\C,0,4.250465,0.,0.007287\C,0,3.537278,1.1825
08,0.007556\C,0,1.931144,3.347952,-1.258898\C,0,1.931968,3.347392,1.27
5818\C,0,1.931144,-3.347952,-1.258898\C,0,1.931968,-3.347392,1.275818\
C,0,-3.863787,0.,-1.260117\C,0,-3.864968,0.,1.274991\H,0,-0.201852,4.5
93437,0.009533\H,0,-3.876648,2.472547,0.008131\H,0,-3.876648,-2.472547
,0.008131\H,0,-0.201852,-4.593437,0.009533\H,0,4.080295,-2.121804,0.00
7478\H,0,4.080295,2.121804,0.007478\H,0,1.625622,2.805206,-2.158673\H,
0,1.482409,4.34493,-1.294334\H,0,3.017374,3.474579,-1.289881\H,0,3.018
218,3.47401,1.306077\H,0,1.483281,4.344362,1.312025\H,0,1.627083,2.804
225,2.175554\H,0,1.625622,-2.805206,-2.158673\H,0,3.017374,-3.474579,-
1.289881\H,0,1.482409,-4.34493,-1.294334\H,0,1.483281,-4.344362,1.3120
25\H,0,3.018218,-3.47401,1.306077\H,0,1.627083,-2.804225,2.175554\H,0,
-3.240625,0.,-2.159724\H,0,-4.510241,-0.881985,-1.29301\H,0,-4.510241,
0.881985,-1.29301\H,0,-4.511532,0.881919,1.307352\H,0,-4.511532,-0.881
919,1.307352\H,0,-3.242658,0.,2.175188\H,0,-2.666189,-4.620348,0.00916
9\H,0,5.335602,0.,0.006898\H,0,-2.666189,4.620348,0.009169\Version=ES
64L-G09RevD.01\State=1-A'\HF=-1099.7116038\RMSD=7.679e-09\Dipole=-0.00
06725,0.,-0.000158\Quadrupole=4.1700172,4.1896955,-8.3597127,0.,0.0011
377,0.\PG=CS [SG(C5H3N1),X(C22H24)]\@
```

## 6.2 1

### 6.2.1 $\omega$ B97XD/6-31G(d)

64

|   |           |           |           |
|---|-----------|-----------|-----------|
| C | -2.848101 | 0.054428  | -0.775401 |
| C | -1.977913 | -1.188766 | -0.756920 |
| C | -0.621470 | -1.185288 | -0.376262 |
| N | 0.024702  | 0.020925  | 0.006219  |
| C | -0.689910 | 1.241451  | -0.010599 |
| C | -2.046424 | 1.283644  | -0.390340 |
| C | 1.389895  | 0.002735  | 0.399312  |
| C | 2.047998  | 1.189121  | 0.778988  |
| C | 1.383419  | 2.553594  | 0.783663  |
| C | -0.068174 | 2.452859  | 0.352888  |
| C | 0.077440  | -2.408033 | -0.382002 |
| C | 1.534898  | -2.543982 | 0.018324  |
| C | 2.119242  | -1.202105 | 0.418977  |
| C | -0.792195 | 3.640004  | 0.321916  |
| C | -2.125283 | 3.698967  | -0.056283 |
| C | -2.724176 | 2.497517  | -0.404682 |
| C | -2.589151 | -2.385125 | -1.127181 |
| C | -1.906883 | -3.585671 | -1.141441 |
| C | -0.577682 | -3.576562 | -0.766965 |
| C | 3.455317  | -1.194850 | 0.816010  |
| C | 4.103636  | -0.035964 | 1.195058  |

|   |           |           |           |
|---|-----------|-----------|-----------|
| C | 3.385703  | 1.143507  | 1.167859  |
| C | 2.136859  | 3.480566  | -0.199730 |
| C | 1.440510  | 3.138530  | 2.214872  |
| C | 2.335982  | -3.099951 | -1.182814 |
| C | 1.636190  | -3.514589 | 1.219111  |
| C | -3.421592 | 0.250829  | -2.198820 |
| C | -4.000692 | -0.128295 | 0.240462  |
| H | -0.287982 | 4.565370  | 0.580603  |
| H | -3.775938 | 2.503886  | -0.671565 |
| H | -3.636628 | -2.374677 | -1.409799 |
| H | -0.026900 | -4.511322 | -0.769465 |
| H | 4.004479  | -2.130482 | 0.826403  |
| H | 3.880735  | 2.064720  | 1.456617  |
| H | 2.100092  | 3.067686  | -1.212422 |
| H | 1.694026  | 4.480680  | -0.223260 |
| H | 3.187229  | 3.591962  | 0.084573  |
| H | 2.472285  | 3.240153  | 2.563324  |
| H | 0.981335  | 4.130647  | 2.257192  |
| H | 0.907073  | 2.486332  | 2.913048  |
| H | 2.273123  | -2.412014 | -2.031504 |
| H | 3.391987  | -3.232539 | -0.929617 |
| H | 1.949537  | -4.072186 | -1.502634 |
| H | 1.224871  | -4.497647 | 0.972845  |
| H | 2.676118  | -3.661747 | 1.524704  |
| H | 1.082044  | -3.118433 | 2.075434  |
| H | -2.610909 | 0.383601  | -2.921715 |
| H | -4.017585 | -0.611365 | -2.510600 |
| H | -4.071429 | 1.129357  | -2.249062 |
| H | -4.662401 | 0.743301  | 0.252413  |
| H | -4.609689 | -1.003250 | -0.006310 |
| H | -3.598834 | -0.266056 | 1.248897  |
| H | -2.399919 | -4.506686 | -1.434442 |
| H | 5.144556  | -0.051073 | 1.500970  |
| C | -2.872961 | 4.974828  | -0.087320 |
| C | -3.818932 | 5.242782  | -1.081045 |
| C | -2.670655 | 5.969512  | 0.873521  |
| C | -4.498906 | 6.454567  | -1.065284 |
| C | -3.401582 | 7.149112  | 0.796391  |
| N | -4.307715 | 7.407157  | -0.149523 |
| H | -4.007859 | 4.524937  | -1.873445 |
| H | -1.968391 | 5.818922  | 1.687873  |
| H | -5.234717 | 6.675738  | -1.835797 |
| H | -3.256848 | 7.928076  | 1.542379  |

|                                              |              |
|----------------------------------------------|--------------|
| Zero-point correction=                       | 0.546034     |
| (Hartree/Particle)                           |              |
| Thermal correction to Energy=                | 0.573635     |
| Thermal correction to Enthalpy=              | 0.574579     |
| Thermal correction to Gibbs Free Energy=     | 0.489178     |
| Sum of electronic and zero-point Energies=   | -1346.066946 |
| Sum of electronic and thermal Energies=      | -1346.039346 |
| Sum of electronic and thermal Enthalpies=    | -1346.038402 |
| Sum of electronic and thermal Free Energies= | -1346.123802 |

1\1\GINC-XE29TH18\Freq\RwB97XD\6-31G(d)\C32H30N2\DRAL\01-Apr-2015\0\#\#  
P Geom=AllCheck Guess=TCheck SCRF=Check GenChk RwB97XD/6-31G(d) Freq\2\0,1\C,-2.8481014185,0.0544275611,-0.7754011216\C,-1.9779126069,-1.1887658801,-0.7569200247\C,-0.6214695604,-1.1852877511,-0.3762623611\N,0.0247017536,0.0209250201,0.0062193461\C,-0.6899100797,1.2414511907,-0.0105993564\C,-2.046424342,1.2836437175,-0.390340357\C,1.3898946059,0.002734775,0.399312368\C,2.0479978878,1.1891211343,0.7789882566\C,1.3834194825,2.5535935515,0.7836632117\C,-0.0681743921,2.4528586732,0.35288

84323\C, 0.0774399045, -2.4080330543, -0.3820020348\C, 1.5348980322, -2.543  
9815077, 0.0183235899\C, 2.1192416424, -1.2021051702, 0.4189767372\C, -0.79  
219458, 3.6400040936, 0.3219163841\C, -2.1252833918, 3.6989668017, -0.05628  
33868\C, -2.7241759929, 2.4975166866, -0.4046822311\C, -2.5891508201, -2.38  
51249718, -1.127180793\C, -1.9068828125, -3.5856706747, -1.1414407811\C, -0  
.577682323, -3.5765622686, -0.7669651594\C, 3.4553174077, -1.1948504668, 0.  
8160099414\C, 4.1036360334, -0.0359641508, 1.1950583187\C, 3.3857031661, 1.  
1435066796, 1.1678594539\C, 2.1368587531, 3.4805659366, -0.1997298697\C, 1.  
4405097742, 3.1385298768, 2.2148717519\C, 2.3359817551, -3.0999510294, -1.1  
828141467\C, 1.6361900821, -3.514589025, 1.2191111114\C, -3.4215919691, 0.2  
508286265, -2.1988197993\C, -4.0006915826, -0.128294787, 0.2404620472\H, -0  
.2879817286, 4.5653703125, 0.5806031224\H, -3.7759382342, 2.5038858467, -0.  
6715654852\H, -3.6366284259, -2.3746773252, -1.4097985354\H, -0.0269002342  
, -4.5113216389, -0.7694653842\H, 4.0044786658, -2.1304817701, 0.8264027047  
\H, 3.8807352178, 2.0647199037, 1.4566170216\H, 2.1000924936, 3.0676858965,  
-1.2124221739\H, 1.694026173, 4.48067975, -0.2232602442\H, 3.1872290227, 3.  
5919618774, 0.0845734759\H, 2.4722851246, 3.240153071, 2.5633238886\H, 0.98  
13345461, 4.1306467044, 2.2571922889\H, 0.9070726214, 2.4863322908, 2.91304  
78318\H, 2.2731227091, -2.412014231, -2.0315043502\H, 3.3919872221, -3.2325  
388674, -0.9296168423\H, 1.9495370694, -4.0721856336, -1.5026344963\H, 1.22  
48713985, -4.4976465923, 0.9728446377\H, 2.6761184098, -3.6617472564, 1.524  
7042586\H, 1.0820439451, -3.1184333182, 2.0754343186\H, -2.6109085563, 0.38  
36012979, -2.9217151964\H, -4.0175852025, -0.611365177, -2.5106001053\H, -4  
.0714285171, 1.1293569189, -2.2490620174\H, -4.6624007348, 0.743301345, 0.2  
524129069\H, -4.6096890026, -1.0032502341, -0.006310385\H, -3.5988343992, -  
0.2660556929, 1.2488974624\H, -2.3999194355, -4.5066860619, -1.4344423891\  
H, 5.1445564226, -0.0510729476, 1.5009701966\C, -2.8729612444, 4.974828487,  
-0.0873203335\C, -3.8189315385, 5.2427816441, -1.0810445792\C, -2.67065453  
88, 5.9695115679, 0.8735206144\C, -4.4989064017, 6.4545669848, -1.065283666  
4\C, -3.4015822499, 7.1491122642, 0.7963906103\N, -4.307714759, 7.407156854  
6, -0.1495230215\H, -4.0078588919, 4.5249371033, -1.8734454977\H, -1.968391  
0159, 5.8189215949, 1.687872706\H, -5.2347172213, 6.6757377859, -1.83579681  
19\H, -3.2568480838, 7.9280758682, 1.5423790956\\Version=ES64L-G09RevD.01  
\HF=-1346.6129805\RMSD=2.695e-09\RMSF=4.843e-06\ZeroPoint=0.5460341\Th  
ermal=0.5736345\Dipole=0.6810648, -1.1650092, 0.0317716\DipoleDeriv=0.11  
58528, 0.0309089, -0.0167265, -0.0179454, 0.2299826, -0.0028324, -0.0054636,  
0.004731, 0.2044822, -0.093628, -0.394766, -0.0627557, -0.1501518, -0.040748  
9, -0.0248666, -0.0301297, -0.0919143, -0.1331013, 0.1372013, 0.7879969, 0.13  
88065, 0.6076798, 1.2470166, 0.3501894, 0.1167532, 0.4144323, 0.1695145, -1.6  
025835, 0.3005607, -0.3673882, 0.3010921, -1.9489465, -0.1892423, -0.3807958  
, -0.197262, -0.2853138, 0.3958188, -0.9654829, -0.0596217, -0.9645123, 1.475  
7832, -0.0591749, -0.059858, -0.0551989, 0.0519759, -0.2394242, 0.5494399, 0.  
0461531, 0.2000901, -0.0873607, 0.0554291, -0.0096988, 0.1311915, -0.0927438  
, 1.5727932, -0.1918825, 0.394615, -0.0102268, -0.1901835, -0.043843, 0.42900  
85, -0.0992811, 0.1790583, -0.2827658, -0.0451372, -0.0535121, -0.2885497, 0.  
1485216, -0.0464977, -0.0909479, 0.018405, -0.13227, 0.2094769, -0.0643943, -  
0.0106547, -0.0175494, 0.1364316, -0.014175, -0.0025474, -0.0195021, 0.20131  
93, 0.1886485, -0.0418884, 0.0824093, 0.3038461, -0.5263144, 0.0262201, 0.121  
2433, -0.0608094, -0.0853755, 0.1652576, -0.0001604, 0.0803469, -0.1605698, -  
0.3815085, -0.0850963, 0.0571702, -0.043487, -0.1013817, 0.1905417, 0.027780  
2, -0.0030123, 0.0266104, 0.1626459, -0.0020068, -0.000388, -0.0019795, 0.209  
8751, -0.319511, 0.1076606, -0.0401832, 0.2687771, 0.1048643, 0.1141826, -0.0  
161606, 0.0725569, -0.1041393, 0.0470984, -0.0508275, 0.0272478, -0.0266534,  
0.0332346, 0.0039322, 0.0962148, -0.0847934, -0.1031277, -0.146815, 0.051115  
4, -0.0301825, 0.0485685, -0.1989419, -0.01568, -0.0254745, -0.0155563, -0.02  
7619, 0.0042487, -0.0019574, 0.0150589, -0.0271512, 0.0833323, 0.0181098, -0.  
0304612, 0.1268358, -0.108437, 0.0545688, 0.0562112, 0.053405, -0.0274568, -0  
.0058863, 0.0123176, 0.0379851, 0.0318272, -0.0975062, -0.1051298, 0.0530843  
, 0.0198188, 0.0770664, -0.032317, 0.0396596, 0.0225996, 0.0323375, -0.121552  
8, 0.004565, -0.0541277, 0.021894, -0.0058083, 0.07814, 0.0280322, 0.0306044,  
0.0172714, -0.103022, 0.0349455, -0.0211889, 0.0386193, -0.0702876, 0.049515  
2, 0.0049571, 0.0306314, 0.0184312, -0.1016783, 0.0051633, 0.0170088, 0.04585

57,-0.0076286,-0.1416772,-0.0026797,0.0396374,0.0043867,-0.1211282,0.0  
193142,-0.0114042,0.0358812,0.0704958,0.0294081,0.0430009,0.0473506,0.  
0216259,-0.0961433,-0.0020286,-0.0037553,0.0072597,-0.0298282,-0.01858  
76,0.0038859,-0.0253275,-0.0204466,0.0058066,-0.0046233,-0.009178,-0.0  
130251,-0.027729,-0.0130568,-0.0355436,0.0088745,0.0061961,0.008406,-0  
.0038739,0.0121753,0.0098131,0.0291463,-0.0329513,-0.0151713,-0.016530  
3,0.0251108,0.0084541,-0.005884,0.0346124,-0.0096595,0.016217,-0.02582  
86,0.015688,0.0157602,-0.0284612,0.0108876,-0.0270012,-0.0177866,-0.03  
78105,0.0064885,0.0078675,0.0084131,0.0099818,0.0071295,0.0104618,-0.0  
297933,-0.0139662,0.0061358,0.0091746,0.0071984,0.002856,-0.0311053,-0  
.0106507,0.0040047,0.086895,-0.1068049,-0.0136766,-0.0813068,-0.029676  
, -0.0402319,-0.0284383,-0.0391602,0.0846176,-0.0806155,0.0067088,-0.04  
38041,-0.0158901,0.1324748,0.0057526,-0.0456396,-0.0038396,0.0846788,-  
0.0989941,-0.0061986,-0.0558208,0.0249238,0.1061213,0.0060354,-0.04908  
22,-0.0046463,0.0901721,0.0314128,0.116332,-0.0016083,0.0890554,-0.058  
2,-0.002318,-0.008855,0.0073187,0.1029863,0.0503399,0.0793813,-0.00366  
85,0.1058075,-0.0786363,0.0026774,0.0009438,-0.0061191,0.104151,0.0625  
125,-0.0623844,-0.0210849,-0.0923372,-0.0645201,-0.0533331,-0.0261888,  
-0.0443896,0.0890289,0.0650418,-0.0089817,-0.0094863,0.0073779,0.04358  
04,-0.0695304,0.0149179,-0.0322941,-0.1040447,0.045843,0.1034717,0.008  
0332,0.0697716,-0.1420523,0.0241391,0.0112155,0.0096923,0.0480242,-0.1  
664246,-0.041432,-0.0353919,-0.0139891,0.0796381,0.010026,-0.0579858,-  
0.0072596,0.0364294,-0.1485448,-0.0357167,-0.0921212,-0.00803,0.084134  
8,-0.0034963,-0.0612478,-0.0028899,0.0180672,0.0450373,0.1087118,0.028  
3706,0.0878286,-0.1376165,-0.0280806,0.0140078,-0.0028719,0.0419256,0.  
0243536,-0.0457294,0.0737623,-0.048172,0.0077573,0.0859475,0.0526351,0  
.0467845,-0.0303143,0.0637074,0.0059753,-0.0100325,-0.0080625,0.005818  
4,0.1050108,0.0096837,0.071401,-0.0653687,-0.1669944,0.0573621,-0.0207  
792,0.018219,0.0813892,0.0013666,-0.0540927,0.0183921,0.0376283,0.0579  
721,-0.101973,-0.0197956,-0.0502226,-0.1272895,-0.075941,-0.002312,-0.  
0659729,0.0246129,0.0571375,-0.1080901,-0.006206,-0.0681174,-0.1377306  
, -0.0177671,-0.0078492,-0.0559587,0.0399954,-0.1510973,0.0621228,-0.07  
42696,0.0138436,0.0737313,0.0200878,-0.0563492,0.0312582,0.0258063,0.0  
201229,0.0178918,0.0846591,0.0298017,0.0509305,-0.061123,0.0659102,-0.  
0269566,-0.0679398,-0.0234549,-0.0154062,0.1105338,-0.0138584,0.061874  
9,0.0212505,0.0667881,0.0222818,-0.0366824,0.0104964,-0.0973495,-0.043  
848,-0.1250995,-0.0794809,-0.0742365,-0.028811,-0.0461147,0.0241327,-0  
.0120162,0.1197605,-0.0121068,0.1393517,-0.0847239,0.0367101,0.000087,  
0.0099312,0.0377128,-0.0246434,0.1106742,0.0238946,0.1448794,-0.067797  
5,-0.0036826,0.0118419,0.0046047,0.0471699,-0.0025843,-0.1050656,-0.00  
40083,-0.1328591,-0.0885931,-0.0306199,-0.0291893,-0.0432732,0.0397616  
, 0.045822,0.0148864,-0.0686953,0.000986,0.061896,0.0203418,-0.0241752,  
0.0235645,-0.1036429,0.0227352,-0.0731305,-0.0394907,-0.0677156,-0.084  
4857,-0.0538434,-0.0386089,-0.054904,0.1000629,-0.1167818,0.0110029,-0  
.0688833,0.006225,0.0571678,-0.0081396,-0.0682446,-0.0074173,0.0986772  
, 0.3085263,-0.4186799,0.0554226,-0.4172124,0.7768658,0.0128401,0.04407  
44,0.0055289,0.1323775,-0.333665,0.258939,-0.0890801,0.2641299,-0.3525  
868,0.1827997,-0.0915381,0.1573284,-0.0948962,-0.1287541,0.1564417,0.1  
106307,0.1490313,-0.5708,-0.1476491,0.0866698,-0.1343448,-0.0814658,0.  
2940962,-0.1828922,0.2188725,-0.2645982,0.3559841,-0.0889012,0.1924082  
, -0.0341161,0.2343439,0.1479716,-0.188369,0.0330753,-0.1063759,0.51244  
31,0.2221568,0.0656458,0.1701799,0.2223449,-0.4467368,0.1986376,-0.064  
6672,0.1991785,-0.6713961,-0.0279614,-0.0564434,-0.0234281,-0.392709,0  
.1020382,-0.0190615,-0.0245829,-0.0316255,0.0334273,-0.0992272,-0.0076  
758,-0.0992898,0.0151701,0.0309248,0.0041355,-0.0997522,0.0188332,0.11  
14255,0.0246924,-0.0918556,0.0382738,0.0084088,-0.0228507,0.0554551,-0  
.1060783,0.0364503,0.0439546,0.0128745,-0.1198549,0.0398591,-0.0337181  
, 0.0687362,-0.0112752,-0.0371045,0.0065745,-0.0546659,-0.0986911,-0.02  
13181,-0.1242791,-0.0272125\Polar=383.1080368,-59.4391609,451.3570912,  
65.2399193,34.4335728,208.6434509\PG=C01 [X(C32H30N2)]\NImag=0\0.4902

## 6.2.2 OLYP/6-311+G(d,p)

```
1\1\GINC-XE29TH4\SP\ROLYP\6-311+G(d,p)\C32H30N2\DRAL\02-Apr-2015\0\#\#P
OLYP/6-311+G(d,p) SCF=Tight SCFCyc=1200 Name=Dral Pop=(Full,NBO) GFIN
PUT GFPRINT Density=Current\2\0,1\C,0,-2.848101,0.054428,-0.775401\C
,0,-1.977913,-1.188766,-0.75692\C,0,-0.62147,-1.185288,-0.376262\N,0,0
.024702,0.020925,0.006219\C,0,-0.68991,1.241451,-0.010599\C,0,-2.04642
4,1.283644,-0.39034\C,0,1.389895,0.002735,0.399312\C,0,2.047998,1.1891
21,0.778988\C,0,1.383419,2.553594,0.783663\C,0,-0.068174,2.452859,0.35
2888\C,0,0.07744,-2.408033,-0.382002\C,0,1.534898,-2.543982,0.018324\C
,0,2.119242,-1.202105,0.418977\C,0,-0.792195,3.640004,0.321916\C,0,-2.
125283,3.698967,-0.056283\C,0,-2.724176,2.497517,-0.404682\C,0,-2.5891
51,-2.385125,-1.127181\C,0,-1.906883,-3.585671,-1.141441\C,0,-0.577682
,-3.576562,-0.766965\C,0,3.455317,-1.19485,0.81601\C,0,4.103636,-0.035
964,1.195058\C,0,3.385703,1.143507,1.167859\C,0,2.136859,3.480566,-0.1
9973\C,0,1.44051,3.13853,2.214872\C,0,2.335982,-3.099951,-1.182814\C,0
,1.63619,-3.514589,1.219111\C,0,-3.421592,0.250829,-2.19882\C,0,-4.000
692,-0.128295,0.240462\H,0,-0.287982,4.56537,0.580603\H,0,-3.775938,2.
503886,-0.671565\H,0,-3.636628,-2.374677,-1.409799\H,0,-0.0269,-4.5113
22,-0.769465\H,0,4.004479,-2.130482,0.826403\H,0,3.880735,2.06472,1.45
6617\H,0,2.100092,3.067686,-1.212422\H,0,1.694026,4.48068,-0.22326\H,0
,3.187229,3.591962,0.084573\H,0,2.472285,3.240153,2.563324\H,0,0.98133
5,4.130647,2.257192\H,0,0.907073,2.486332,2.913048\H,0,2.273123,-2.412
014,-2.031504\H,0,3.391987,-3.232539,-0.929617\H,0,1.949537,-4.072186,
-1.502634\H,0,1.224871,-4.497647,0.972845\H,0,2.676118,-3.661747,1.524
704\H,0,1.082044,-3.118433,2.075434\H,0,-2.610909,0.383601,-2.921715\H
,0,-4.017585,-0.611365,-2.5106\H,0,-4.071429,1.129357,-2.249062\H,0,-4
.662401,0.743301,0.252413\H,0,-4.609689,-1.00325,-0.00631\H,0,-3.59883
4,-0.266056,1.248897\H,0,-2.399919,-4.506686,-1.434442\H,0,5.144556,-0
.051073,1.50097\C,0,-2.872961,4.974828,-0.08732\C,0,-3.818932,5.242782
,-1.081045\C,0,-2.670655,5.969512,0.873521\C,0,-4.498906,6.454567,-1.0
65284\C,0,-3.401582,7.149112,0.796391\N,0,-4.307715,7.407157,-0.149523
\H,0,-4.007859,4.524937,-1.873445\H,0,-1.968391,5.818922,1.687873\H,0,
-5.234717,6.675738,-1.835797\H,0,-3.256848,7.928076,1.542379\Version=
ES64L-G09RevD.01\State=1-A\HF=-1346.7792788\RMSD=2.475e-09\Dipole=0.75
40285,-1.2905343,0.0360994\Quadrupole=5.0403269,-7.6080508,2.567724,11
.508036,5.2322941,3.6420685\PG=C01 [X(C32H30N2)]\@
```

## 6.3 2

### 6.3.1 $\omega$ B97XD/6-31G(d)

73

|   |           |           |           |
|---|-----------|-----------|-----------|
| C | -2.887193 | 0.256166  | -0.577770 |
| C | -1.786493 | -0.014433 | -1.587175 |
| C | -0.420084 | -0.080142 | -1.252068 |
| N | 0.012042  | 0.132326  | 0.085897  |
| C | -0.935489 | 0.407965  | 1.101255  |
| C | -2.312079 | 0.471350  | 0.809910  |
| C | 1.390525  | 0.070105  | 0.403651  |
| C | 1.842876  | 0.299031  | 1.718247  |
| C | 0.919823  | 0.609742  | 2.881947  |
| C | -0.529820 | 0.625287  | 2.433038  |
| C | 0.508472  | -0.362268 | -2.272562 |
| C | 2.004028  | -0.476758 | -2.040555 |
| C | 2.350135  | -0.220758 | -0.585546 |
| C | -1.482075 | 0.882297  | 3.413315  |
| C | -2.841201 | 0.944367  | 3.143981  |
| C | -3.222993 | 0.736406  | 1.826962  |
| C | -2.183703 | -0.219519 | -2.907409 |

|   |           |           |           |
|---|-----------|-----------|-----------|
| C | -1.277501 | -0.492452 | -3.913144 |
| C | 0.060184  | -0.562396 | -3.577034 |
| C | 3.698153  | -0.277703 | -0.247049 |
| C | 4.160687  | -0.044796 | 1.039506  |
| C | 3.203176  | 0.242654  | 2.001000  |
| C | 1.283673  | 2.000351  | 3.453861  |
| C | 1.097912  | -0.475844 | 3.969880  |
| C | 2.732416  | 0.565818  | -2.921759 |
| C | 2.461404  | -1.905059 | -2.420529 |
| C | -3.661746 | 1.527031  | -1.000611 |
| C | -3.842220 | -0.960862 | -0.543836 |
| H | -1.148691 | 1.068444  | 4.429087  |
| H | -4.281503 | 0.755746  | 1.588915  |
| H | -3.239183 | -0.166970 | -3.152762 |
| H | 0.784584  | -0.783689 | -4.353602 |
| H | 4.424016  | -0.484814 | -1.026654 |
| H | 3.531538  | 0.405758  | 3.022262  |
| H | 1.165065  | 2.770676  | 2.685746  |
| H | 0.643033  | 2.262523  | 4.301044  |
| H | 2.319511  | 2.025924  | 3.805443  |
| H | 2.128756  | -0.511417 | 4.333669  |
| H | 0.454294  | -0.282127 | 4.832871  |
| H | 0.844076  | -1.461543 | 3.568390  |
| H | 2.410611  | 1.578202  | -2.659389 |
| H | 3.816906  | 0.508600  | -2.792201 |
| H | 2.521854  | 0.405240  | -3.982850 |
| H | 2.248747  | -2.122388 | -3.471326 |
| H | 3.537852  | -2.030613 | -2.269703 |
| H | 1.941841  | -2.646888 | -1.806411 |
| H | -2.988460 | 2.389032  | -1.033679 |
| H | -4.112695 | 1.407511  | -1.989767 |
| H | -4.469530 | 1.751736  | -0.298044 |
| H | -4.656387 | -0.809282 | 0.171028  |
| H | -4.294280 | -1.136513 | -1.524268 |
| H | -3.297516 | -1.864136 | -0.252672 |
| H | -1.606537 | -0.650820 | -4.934832 |
| C | -3.833177 | 1.214204  | 4.207847  |
| C | -4.959000 | 2.009189  | 3.976146  |
| C | -3.689349 | 0.683985  | 5.492833  |
| C | -5.862566 | 2.226780  | 5.009725  |
| C | -4.650036 | 0.965904  | 6.456789  |
| N | -5.728234 | 1.722322  | 6.238553  |
| H | -5.119262 | 2.474786  | 3.008450  |
| H | -2.851931 | 0.036682  | 5.735194  |
| H | -6.741262 | 2.846435  | 4.842655  |
| H | -4.551292 | 0.553521  | 7.458915  |
| C | 5.601776  | -0.092436 | 1.370932  |
| C | 6.171689  | 0.809358  | 2.274143  |
| C | 6.457988  | -1.036743 | 0.797894  |
| C | 7.530151  | 0.724630  | 2.554608  |
| C | 7.803973  | -1.033547 | 1.145065  |
| N | 8.351334  | -0.175302 | 2.008893  |
| H | 5.570051  | 1.586273  | 2.735948  |
| H | 6.077954  | -1.782510 | 0.106190  |
| H | 7.985694  | 1.424218  | 3.252578  |
| H | 8.480091  | -1.767006 | 0.710320  |

|                                          |          |
|------------------------------------------|----------|
| Zero-point correction=                   | 0.616398 |
| (Hartree/Particle)                       |          |
| Thermal correction to Energy=            | 0.648527 |
| Thermal correction to Enthalpy=          | 0.649471 |
| Thermal correction to Gibbs Free Energy= | 0.554135 |

Sum of electronic and zero-point Energies= -1593.010186  
Sum of electronic and thermal Energies= -1592.978056  
Sum of electronic and thermal Enthalpies= -1592.977112  
Sum of electronic and thermal Free Energies= -1593.072448

1\1\GINC-XE29TH103\Freq\RwB97XD\6-31G(d)\C37H33N3\DRAL\01-Apr-2015\0\#\n  
#P Geom=AllCheck Guess=TChech SCRF=Check GenChk RwB97XD/6-31G(d) Freq\  
\3\0,1\C,-2.8871928937,0.2561655714,-0.577769735\C,-1.7864927069,-0.0  
14433454,-1.5871748555\C,-0.4200836247,-0.0801416117,-1.2520675672\N,0  
.0120423553,0.1323263435,0.0858966775\C,-0.9354892612,0.4079649946,1.1  
012553669\C,-2.312078904,0.4713504822,0.8099096466\C,1.3905248569,0.07  
01050847,0.4036509131\C,1.8428760645,0.2990312939,1.7182467393\C,0.919  
8227361,0.6097417914,2.8819473683\C,-0.5298196061,0.6252873339,2.43303  
76221\C,0.5084719253,-0.3622678006,-2.2725621256\C,2.0040284945,-0.476  
7577587,-2.0405549401\C,2.3501353477,-0.2207580749,-0.5855459102\C,-1.  
4820745516,0.8822965169,3.4133154377\C,-2.8412006329,0.944366758,3.143  
981188\C,-3.2229933046,0.736406142,1.8269622661\C,-2.1837027432,-0.219  
5190634,-2.907409381\C,-1.2775009291,-0.4924520633,-3.9131438667\C,0.0  
601836,-0.5623956942,-3.5770343902\C,3.6981526125,-0.2777027938,-0.247  
0494331\C,4.1606866155,-0.0447958275,1.03950635\C,3.2031757929,0.24265  
36422,2.0009999457\C,1.283672572,2.0003511377,3.4538605709\C,1.0979121  
721,-0.4758440425,3.9698797671\C,2.7324160642,0.5658181452,-2.92175875  
34\C,2.4614037149,-1.9050591713,-2.4205294096\C,-3.6617464015,1.527031  
1009,-1.0006112092\C,-3.8422203935,-0.9608619906,-0.5438357053\H,-1.14  
86911627,1.0684437183,4.4290868124\H,-4.2815033522,0.7557455169,1.5889  
146465\H,-3.2391833771,-0.1669695397,-3.1527621473\H,0.784584088,-0.78  
36890892,-4.3536018828\H,4.4240161157,-0.4848136671,-1.0266535064\H,3.  
5315380655,0.405757913,3.0222615314\H,1.1650650359,2.7706761111,2.6857  
458755\H,0.6430329779,2.2625233342,4.3010440419\H,2.3195105595,2.02592  
38699,3.8054427679\H,2.1287559523,-0.5114168721,4.3336692579\H,0.45429  
42195,-0.2821271404,4.8328709693\H,0.8440758597,-1.4615426548,3.568390  
3383\H,2.4106112027,1.5782023456,-2.6593894236\H,3.8169059869,0.508599  
5954,-2.7922013145\H,2.5218544814,0.4052402024,-3.9828502626\H,2.24874  
73876,-2.1223884046,-3.4713255941\H,3.5378520988,-2.0306129662,-2.2697  
026629\H,1.9418414765,-2.6468884056,-1.8064110323\H,-2.9884595591,2.38  
90323771,-1.0336785339\H,-4.1126954579,1.4075106329,-1.9897670928\H,-4  
.4695301045,1.7517364596,-0.2980437235\H,-4.6563874956,-0.8092824578,0  
.1710280634\H,-4.2942803301,-1.1365125015,-1.5242684882\H,-3.297515962  
6,-1.8641357565,-0.2526715986\H,-1.6065374241,-0.6508201007,-4.9348318  
5\C,-3.8331772166,1.2142035637,4.2078474877\C,-4.9589996752,2.00918888  
72,3.9761458563\C,-3.6893489401,0.6839852068,5.492832689\C,-5.86256608  
43,2.2267799429,5.0097253458\C,-4.6500358213,0.9659042718,6.4567892965  
\N,-5.7282335733,1.7223217866,6.2385526423\H,-5.1192616963,2.474786336  
3,3.0084503822\H,-2.8519305576,0.0366823706,5.735193544\H,-6.741261753  
1,2.8464354329,4.8426550531\H,-4.5512921931,0.553521281,7.4589148986\C  
,5.6017764387,-0.0924360483,1.3709323455\C,6.171689126,0.8093584294,2.  
2741432367\C,6.4579884291,-1.0367428105,0.7978943179\C,7.5301506374,0.  
7246304521,2.554608071\C,7.8039729736,-1.0335473607,1.1450653637\N,8.3  
513337662,-0.1753023611,2.0088930724\H,5.5700510696,1.5862729685,2.735  
9475852\H,6.0779540324,-1.7825103135,0.1061896797\H,7.9856939384,1.424  
2182205,3.2525775872\H,8.4800908101,-1.7670064254,0.7103198322\Versio  
n=ES64L-G09RevD.01\HF=-1593.6265834\RMSD=3.356e-09\RMSF=4.336e-06\Zero  
Point=0.6163976\Thermal=0.648527\Dipole=-0.3959358,-0.2005968,-1.23088  
73\DipoleDeriv=0.1227623,0.0070888,0.0069457,-0.0123799,0.2049756,0.00  
60603,-0.0381488,0.0086409,0.2261636,-0.0131811,-0.0776147,-0.3838807,  
-0.0340801,-0.1027603,0.0160805,-0.1901942,0.0001858,-0.1681509,-0.029  
9474,0.1126099,0.5482083,0.1183097,0.1036252,0.2239757,0.5467329,0.226  
8672,1.5096579,-2.2753244,0.194626,0.134808,0.212162,-0.2179674,-0.311  
6245,0.1322172,-0.3105792,-1.7529143,0.9228943,-0.2560468,-1.0142105,-  
0.314597,0.1476909,0.2483913,-1.2146647,0.2521742,0.8875421,-0.4151492  
,0.1056447,0.4584062,0.0484853,-0.1100908,0.0143261,0.1707844,0.022337  
2,0.0875832,2.0128272,-0.0982381,0.3046061,-0.076758,0.0680505,-0.0664



006,0.5087521,-0.0821495,-0.1219733,-0.3128598,-0.0124768,-0.1551497,-  
0.0641902,-0.0911102,0.0432939,-0.5416079,0.0786894,0.0290073,0.242159  
2,-0.0100003,-0.0455658,-0.0012035,0.19303,-0.0212576,-0.0479602,-0.01  
35932,0.1131128,0.1380804,-0.0018167,0.0921053,0.0924909,-0.1279801,-0  
.0708107,0.4724604,-0.093892,-0.3873071,0.2106881,-0.0073117,0.128129,  
-0.0486255,-0.1147833,-0.0604083,-0.0655142,-0.0462272,-0.3792142,0.17  
43149,0.0098143,0.0283618,0.0156898,0.1987693,-0.0126975,0.0757097,-0.  
0114697,0.1799041,-0.5527642,0.0268609,-0.0192485,0.0695825,-0.1022717  
,0.0569946,0.2703374,0.0460419,0.2140527,0.050156,-0.0116693,-0.037431  
4,-0.0852869,-0.085932,0.0940724,0.0074579,0.0306879,-0.0260826,-0.159  
0998,0.0196142,0.02208,0.0242738,-0.0225145,-0.0291544,0.0559049,-0.02  
56345,-0.1422282,0.0058356,0.0058748,0.0061387,0.04891,-0.1229959,-0.0  
367705,-0.0742998,0.0457887,0.0700582,0.0572319,-0.0026036,0.0735571,-  
0.014836,-0.1066967,0.0164671,0.0127379,0.0205727,0.0011983,-0.1149662  
,0.0055221,0.0426801,0.0058572,-0.1281075,0.0201123,0.0418158,0.020443  
9,0.0036968,-0.003629,-0.0258689,-0.0651738,-0.0157209,-0.1018844,0.04  
12549,-0.001381,0.0326846,0.052223,0.0545455,-0.0035392,0.0011754,0.09  
41862,-0.1130313,0.0494023,0.0597367,0.0105464,0.0149483,-0.1925721,0.  
0179758,0.0058947,0.0163599,-0.0221884,-0.0177127,-0.0317499,-0.021984  
4,-0.1066482,0.0488735,-0.018432,0.0008493,-0.1228901,-0.1039238,0.002  
0632,-0.0157587,0.00753,-0.009361,0.0020822,-0.0147369,-0.0083132,0.00  
47411,0.0108615,0.0109642,-0.00508,-0.0270487,-0.0240071,-0.0006254,0.  
0010835,-0.0078717,-0.0073901,0.0123861,-0.0219841,-0.0110483,0.018661  
, -0.0256764,-0.0145314,-0.005303,0.0282241,0.0171956,0.0077809,-0.0350  
62,0.0062403,0.0075548,-0.0161433,-0.0077418,0.0278668,0.0340484,-0.0  
0941,0.0105889,0.0165067,0.0047034,-0.0204243,-0.0221904,-0.0317569,0.  
0220416,-0.0337778,-0.0209047,0.0092199,-0.0138933,0.0021812,-0.000427  
9,0.0055709,-0.0329087,-0.0172571,-0.0188331,0.0316134,0.0115793,0.012  
8685,-0.0057892,-0.0087252,-0.0028652,0.1140645,-0.022028,-0.0766691,-  
0.0010565,0.0900282,-0.0290612,-0.0545236,-0.0274027,-0.0607445,-0.082  
136,0.0041944,-0.0376934,-0.0027825,0.1007078,0.0230049,-0.0605438,0.0  
059835,0.1247285,-0.1117466,0.0096437,-0.053719,0.014535,0.1029833,0.0  
033041,-0.0249396,-0.0001939,0.0934002,-0.0012236,0.035179,0.122125,0.  
0309439,0.0952993,-0.0342499,0.0900568,-0.0272882,-0.000896,0.0329981,  
0.026479,0.1006783,0.0220206,0.0890485,-0.0311456,0.1255,-0.0216273,0.  
0142773,0.1174381,-0.0151428,-0.0507682,-0.0048548,0.090244,-0.0303527  
, -0.0768632,-0.0213058,-0.0645736,0.0650827,0.0148626,-0.0170698,0.001  
8734,-0.0443912,0.0630277,-0.0077585,0.1069384,-0.0132609,-0.001515,0.  
045323,0.1252903,0.0334735,0.027418,-0.0360293,0.1096932,-0.0579803,-0  
.0704443,-0.1589208,-0.0297269,-0.0851591,-0.0094075,0.0417984,0.00670  
38,-0.0763338,-0.0013491,0.0600582,-0.1464846,0.0225842,-0.0949889,0.0  
05614,0.0452508,0.0066517,-0.0734762,0.0199523,0.0573831,-0.0035148,0.  
0147711,0.1374433,0.0221142,0.0384892,-0.0292249,0.123559,-0.0121725,-  
0.0858103,0.0589344,-0.0426233,-0.0087674,-0.0306334,-0.0941215,-0.023  
3262,-0.0175736,-0.0675886,0.0425508,0.0539392,0.0530687,0.0031344,0.0  
255001,-0.1042121,-0.0144171,0.0133669,-0.0466466,0.0604183,-0.1751552  
, -0.0079079,0.002119,0.009193,0.0458793,0.0100202,-0.0346381,0.0131327  
, 0.0861365,0.0748941,-0.0154416,-0.0663743,-0.0103748,0.0444846,-0.032  
6358,-0.0295441,-0.0095396,-0.1685081,0.0741548,-0.0172547,-0.0677169,  
-0.0097722,0.0325868,-0.0350104,-0.0350089,-0.0679871,-0.1562411,-0.17  
56421,0.0486726,-0.0130632,0.0238458,0.0346607,0.0036527,-0.0417505,0.  
0142897,0.0845012,0.0299581,-0.0715604,0.039627,-0.0408962,-0.0396845,  
0.0581418,0.0438222,0.087498,0.016424,0.0087979,-0.102271,0.0131257,-0  
.0625143,-0.0688976,0.0108175,-0.0008901,0.0030377,0.0664153,0.0429438  
, 0.0011965,-0.0840797,-0.019802,0.0463588,-0.023814,-0.1131221,0.00161  
98,-0.1346986,-0.0680568,0.0505667,0.1101776,0.0447513,0.0278425,-0.01  
8954,0.1445303,-0.0380499,-0.0105243,-0.073302,0.0026973,0.1136005,0.0  
256026,0.0407155,-0.0188838,0.1433685,-0.0070073,-0.0187594,0.038404,-  
0.0316603,-0.0766938,-0.0231971,0.0367117,-0.0285659,-0.1124543,-0.047  
5606,-0.126836,0.0322661,0.0865283,-0.0186564,0.0439313,-0.0761674,0.0  
386715,-0.0190105,0.0480381,0.0529781,0.038203,-0.0024483,-0.0559838,-  
0.0013841,0.1129139,-0.038751,-0.0558365,-0.0374505,-0.1121659,0.51845

97,-0.160242,-0.4142547,-0.1581936,0.1215968,0.0811605,-0.4588707,0.07  
51393,0.5620837,-0.4806562,0.1554653,0.2010371,0.1563098,-0.1585485,-0  
.1211725,0.2430039,-0.1529985,-0.1464119,-0.1811942,-0.0662453,0.24977  
2,-0.0443776,-0.0664578,-0.0101619,0.2472075,-0.0031783,-0.5295779,0.4  
600173,-0.2479226,-0.0834714,-0.2462632,0.1715368,-0.0035356,-0.192103  
9,0.035349,0.2539144,0.2335659,-0.0622438,-0.204916,-0.0687878,0.09268  
56,-0.0888553,-0.1221462,-0.1180807,0.5585278,-0.5605169,0.1076683,0.1  
864226,0.1032732,-0.3540616,-0.0123302,0.2054068,-0.0082405,-0.5933262  
,0.1121585,0.0096716,-0.0226224,-0.0127599,0.0819577,0.0758723,-0.0318  
835,0.0774348,-0.0409156,0.0008069,0.089279,-0.0435936,0.0925314,0.040  
8389,0.0058286,-0.0372623,0.0242681,0.108848,-0.0772919,0.1072996,0.00  
06677,0.1184253,0.0114724,0.0112318,-0.0252754,0.0301844,0.050919,0.05  
9874,0.0258762,-0.0177314,0.0122992,0.0512666,0.0872141,0.0147278,0.06  
81995,-0.1211611,0.9691813,-0.0516026,0.1675327,-0.0394364,0.1254052,0  
.0403141,0.2111407,0.0503756,0.1085443,-0.5175321,-0.1635638,-0.210655  
3,-0.1437987,-0.077718,-0.0216203,-0.2171137,-0.0144459,-0.1809661,-0.  
6155555,0.1974588,0.0417362,0.167248,-0.1026196,0.0354799,0.0048143,0.  
0595427,-0.0714835,0.4911657,0.1209015,0.2118694,0.0730941,0.1974446,0  
.165121,0.1388627,0.1794543,0.1976319,0.5564175,-0.216136,-0.0515823,-  
0.1623586,0.2167853,0.1275219,0.0462131,0.1052281,0.114102,-0.7675711,  
0.033298,-0.0823023,0.0279783,-0.3813348,-0.0605635,-0.0997425,-0.0683  
403,-0.3585253,0.064556,0.0816176,0.0517931,0.0923118,0.0163772,-0.045  
3485,0.0430617,-0.0593198,0.0715807,0.0961048,-0.0530779,-0.0489585,-0  
.065192,0.0269598,-0.0742191,-0.032293,-0.0883149,0.0312812,0.0059318,  
-0.0403073,-0.0527766,-0.0696187,-0.0117691,-0.1003592,-0.0766323,-0.0  
95955,-0.0052604,-0.037702,0.0813957,0.0353539,0.1090081,-0.0220888,-0  
.0662656,0.0546808,-0.0728931,0.0444258\Polar=563.8703917,-51.5295358,  
229.9053356,-23.9385552,54.5692408,461.016637\PG=C01 [X(C37H33N3)]\NIm  
ag=0\

### 6.3.2 OLYP/6-311+G(d,p)

1\1\GINC-XE29TH8\SP\ROLYP\6-311+G(d,p)\C37H33N3\DRAL\02-Apr-2015\0\#\#P  
OLYP/6-311+G(d,p) SCF=Tight SCFCyc=1200 Name=Dral Pop=(Full,NBO) GFIN  
PUT GFPRINT Density=Current\3\0,1\C,0,-2.887193,0.256166,-0.57777\C,  
0,-1.786493,-0.014433,-1.587175\C,0,-0.420084,-0.080142,-1.252068\N,0,  
0.012042,0.132326,0.085897\C,0,-0.935489,0.407965,1.101255\C,0,-2.3120  
79,0.47135,0.80991\C,0,1.390525,0.070105,0.403651\C,0,1.842876,0.29903  
1,1.718247\C,0,0.919823,0.609742,2.881947\C,0,-0.52982,0.625287,2.4330  
38\C,0,0.508472,-0.362268,-2.272562\C,0,2.004028,-0.476758,-2.040555\C  
,0,2.350135,-0.220758,-0.585546\C,0,-1.482075,0.882297,3.413315\C,0,-2  
.841201,0.944367,3.143981\C,0,-3.222993,0.736406,1.826962\C,0,-2.18370  
3,-0.219519,-2.907409\C,0,-1.277501,-0.492452,-3.913144\C,0,0.060184,-  
0.562396,-3.577034\C,0,3.698153,-0.277703,-0.247049\C,0,4.160687,-0.04  
4796,1.039506\C,0,3.203176,0.242654,2.001\C,0,1.283673,2.000351,3.4538  
61\C,0,1.097912,-0.475844,3.96988\C,0,2.732416,0.565818,-2.921759\C,0,  
2.461404,-1.905059,-2.420529\C,0,-3.661746,1.527031,-1.000611\C,0,-3.8  
4222,-0.960862,-0.543836\H,0,-1.148691,1.068444,4.429087\H,0,-4.281503  
,0.755746,1.588915\H,0,-3.239183,-0.16697,-3.152762\H,0,0.784584,-0.78  
3689,-4.353602\H,0,4.424016,-0.484814,-1.026654\H,0,3.531538,0.405758,  
3.022262\H,0,1.165065,2.770676,2.685746\H,0,0.643033,2.262523,4.301044  
\H,0,2.319511,2.025924,3.805443\H,0,2.128756,-0.511417,4.333669\H,0,0.  
454294,-0.282127,4.832871\H,0,0.844076,-1.461543,3.56839\H,0,2.410611,  
1.578202,-2.659389\H,0,3.816906,0.5086,-2.792201\H,0,2.521854,0.40524,  
-3.98285\H,0,2.248747,-2.122388,-3.471326\H,0,3.537852,-2.030613,-2.26  
9703\H,0,1.941841,-2.646888,-1.806411\H,0,-2.98846,2.389032,-1.033679\  
H,0,-4.112695,1.407511,-1.989767\H,0,-4.46953,1.751736,-0.298044\H,0,-  
4.656387,-0.809282,0.171028\H,0,-4.29428,-1.136513,-1.524268\H,0,-3.29  
7516,-1.864136,-0.252672\H,0,-1.606537,-0.65082,-4.934832\C,0,-3.83317  
7,1.214204,4.207847\C,0,-4.959,2.009189,3.976146\C,0,-3.689349,0.68398  
5,5.492833\C,0,-5.862566,2.22678,5.009725\C,0,-4.650036,0.965904,6.456  
789\N,0,-5.728234,1.722322,6.238553\H,0,-5.119262,2.474786,3.00845\H,0

, -2.851931, 0.036682, 5.735194\H, 0, -6.741262, 2.846435, 4.842655\H, 0, -4.551292, 0.553521, 7.458915\C, 0, 5.601776, -0.092436, 1.370932\C, 0, 6.171689, 0.809358, 2.274143\C, 0, 6.457988, -1.036743, 0.797894\C, 0, 7.530151, 0.72463, 2.554608\C, 0, 7.803973, -1.033547, 1.145065\N, 0, 8.351334, -0.175302, 2.008893\H, 0, 5.570051, 1.586273, 2.735948\H, 0, 6.077954, -1.78251, 0.10619\H, 0, 7.985694, 1.424218, 3.252578\H, 0, 8.480091, -1.767006, 0.71032\\Version=ES64L-G09RevD.01\State=1-A\HF=-1593.8467835\RMSD=6.509e-09\Dipole=-0.4348315, -0.2206285, -1.3491243\Quadrupole=-21.7266355, 10.5143819, 11.2122536, 2.0289046, 11.5457827, 0.2488517\PG=C01 [X(C37H33N3)]\@

## 6.4 3

### 6.4.1 $\omega$ B97XD/6-31G(d)

82

|   |           |           |           |
|---|-----------|-----------|-----------|
| C | 0.938352  | 1.899681  | -1.991387 |
| C | 0.034226  | 0.709014  | -2.252707 |
| C | -0.338221 | -0.219188 | -1.261127 |
| N | 0.126980  | -0.088021 | 0.071132  |
| C | 0.971532  | 0.993999  | 0.423315  |
| C | 1.364891  | 1.947158  | -0.535677 |
| C | -0.254400 | -1.037354 | 1.051712  |
| C | 0.208417  | -0.933795 | 2.377943  |
| C | 1.114639  | 0.181450  | 2.866873  |
| C | 1.441502  | 1.146464  | 1.742208  |
| C | -1.186414 | -1.281139 | -1.630324 |
| C | -1.679553 | -2.338540 | -0.659781 |
| C | -1.107296 | -2.110302 | 0.727387  |
| C | 2.261043  | 2.223172  | 2.063592  |
| C | 2.655113  | 3.172927  | 1.132719  |
| C | 2.189868  | 3.002931  | -0.162766 |
| C | -0.434166 | 0.555638  | -3.553157 |
| C | -1.267761 | -0.485166 | -3.934600 |
| C | -1.626342 | -1.388773 | -2.945386 |
| C | -1.469094 | -3.026225 | 1.709363  |
| C | -1.016840 | -2.943632 | 3.017876  |
| C | -0.175140 | -1.883234 | 3.319121  |
| C | 2.430215  | -0.435466 | 3.397894  |
| C | 0.395475  | 0.954201  | 3.998254  |
| C | -1.236246 | -3.731089 | -1.168086 |
| C | -3.222989 | -2.268630 | -0.580347 |
| C | 2.200868  | 1.780590  | -2.877623 |
| C | 0.167887  | 3.196213  | -2.336077 |
| H | 2.632563  | 2.312249  | 3.079227  |
| H | 2.463696  | 3.740229  | -0.910177 |
| H | -0.116488 | 1.266541  | -4.308762 |
| H | -2.302213 | -2.196752 | -3.205836 |
| H | -2.114286 | -3.855220 | 1.437855  |
| H | 0.175830  | -1.777175 | 4.340360  |
| H | 2.943519  | -0.981241 | 2.600292  |
| H | 3.108624  | 0.336114  | 3.773367  |
| H | 2.238267  | -1.132074 | 4.219282  |
| H | 0.148263  | 0.296166  | 4.836097  |
| H | 1.024143  | 1.759463  | 4.389308  |
| H | -0.533532 | 1.396501  | 3.625915  |
| H | -0.145473 | -3.783641 | -1.236713 |
| H | -1.574465 | -4.526211 | -0.497886 |
| H | -1.651392 | -3.941307 | -2.157924 |
| H | -3.679726 | -2.433748 | -1.560516 |
| H | -3.618444 | -3.029029 | 0.099811  |

|   |           |           |           |
|---|-----------|-----------|-----------|
| H | -3.541786 | -1.287030 | -0.216571 |
| H | 2.747439  | 0.862764  | -2.640254 |
| H | 1.941510  | 1.756800  | -3.940065 |
| H | 2.874848  | 2.628343  | -2.722868 |
| H | 0.783104  | 4.083870  | -2.163807 |
| H | -0.136035 | 3.208526  | -3.386926 |
| H | -0.732005 | 3.280203  | -1.719319 |
| C | 3.526525  | 4.309799  | 1.503758  |
| C | 4.514233  | 4.788562  | 0.638730  |
| C | 3.400401  | 4.955896  | 2.736431  |
| C | 5.303815  | 5.861466  | 1.035391  |
| C | 4.244375  | 6.018473  | 3.037170  |
| N | 5.187125  | 6.480300  | 2.212457  |
| H | 4.684626  | 4.316589  | -0.324114 |
| H | 2.637598  | 4.652034  | 3.446782  |
| H | 6.078362  | 6.240637  | 0.371860  |
| H | 4.152728  | 6.531735  | 3.992156  |
| C | -1.414607 | -3.935644 | 4.041052  |
| C | -0.515185 | -4.387025 | 5.010849  |
| C | -2.706683 | -4.466927 | 4.082985  |
| C | -0.939214 | -5.320221 | 5.949466  |
| C | -3.027409 | -5.398743 | 5.063107  |
| N | -2.171410 | -5.831587 | 5.991578  |
| H | 0.511961  | -4.035020 | 5.021502  |
| H | -3.463031 | -4.141422 | 3.375298  |
| H | -0.246326 | -5.682998 | 6.705942  |
| H | -4.030699 | -5.817325 | 5.109243  |
| C | -1.755297 | -0.620836 | -5.325029 |
| C | -2.103462 | 0.495965  | -6.089889 |
| C | -1.891400 | -1.870578 | -5.935379 |
| C | -2.556385 | 0.314646  | -7.391194 |
| C | -2.357521 | -1.941890 | -7.242959 |
| N | -2.689539 | -0.877479 | -7.976963 |
| H | -2.046546 | 1.495142  | -5.668884 |
| H | -1.614843 | -2.778736 | -5.408345 |
| H | -2.835045 | 1.175986  | -7.995033 |
| H | -2.464539 | -2.908791 | -7.730301 |

|                                              |              |
|----------------------------------------------|--------------|
| Zero-point correction=                       | 0.686556     |
| (Hartree/Particle)                           |              |
| Thermal correction to Energy=                | 0.723504     |
| Thermal correction to Enthalpy=              | 0.724448     |
| Thermal correction to Gibbs Free Energy=     | 0.617290     |
| Sum of electronic and zero-point Energies=   | -1839.953276 |
| Sum of electronic and thermal Energies=      | -1839.916328 |
| Sum of electronic and thermal Enthalpies=    | -1839.915384 |
| Sum of electronic and thermal Free Energies= | -1840.022542 |

1\1\GINC-XE29TH66\Freq\RwB97XD\6-31G(d)\C42H36N4\DRAL\01-Apr-2015\0\#\#  
P Geom=AllCheck Guess=TCheck SCRF=Check GenChk RwB97XD/6-31G(d) Freq\4\0,1\C,0.9383522663,1.8996805481,-1.9913869621\C,0.0342255805,0.7090143172,-2.2527067178\C,-0.3382214331,-0.219187577,-1.2611266576\N,0.1269797173,-0.0880210211,0.0711318086\C,0.9715323835,0.9939989731,0.4233147787\C,1.3648910822,1.9471584574,-0.5356770789\C,-0.2544003112,-1.0373537858,1.051711742\C,0.2084171081,-0.9337954526,2.377943446\C,1.1146385684,0.1814499005,2.8668729479\C,1.4415021693,1.1464642611,1.7422084474\C,-1.1864137677,-1.2811386284,-1.6303237283\C,-1.6795531269,-2.3385400559,-0.659780693\C,-1.1072959545,-2.1103015747,0.7273872468\C,2.2610427799,2.2231716939,2.0635920013\C,2.6551130008,3.1729269404,1.1327191447\C,2.1898684589,3.0029305046,-0.1627662955\C,-0.4341655568,0.5556380997,-3.5531573674\C,-1.2677606256,-0.4851661613,-3.9346000386\C,-1.6263418894,-1.3887733537,-2.9453856844\C,-1.4690943353,-3.0262247863,1

.7093625174\C,-1.0168397968,-2.9436315922,3.0178756051\C,-0.1751399706  
, -1.8832339866,3.3191210783\C,2.4302150994,-0.4354657702,3.3978942234\  
C,0.3954749641,0.9542008769,3.9982544861\C,-1.2362461469,-3.7310886761  
, -1.1680856638\C,-3.2229893185,-2.2686303046,-0.5803468923\C,2.2008682  
247,1.7805898256,-2.877623236\C,0.1678872897,3.1962133527,-2.336076677  
5\H,2.6325634957,2.3122485261,3.0792271164\H,2.4636955537,3.7402291157  
, -0.9101772955\H,-0.1164884379,1.2665407935,-4.3087616704\H,-2.3022130  
996,-2.1967519125,-3.2058355745\H,-2.1142857479,-3.8552203278,1.437854  
8772\H,0.1758299566,-1.7771745472,4.3403596808\H,2.9435186877,-0.98124  
14206,2.6002917203\H,3.1086241805,0.3361141133,3.7733670068\H,2.238267  
0534,-1.1320735029,4.2192822717\H,0.1482629094,0.2961663334,4.83609704  
09\H,1.0241426566,1.7594629807,4.3893080974\H,-0.5335320443,1.39650108  
29,3.6259150256\H,-0.1454726923,-3.7836405055,-1.2367125043\H,-1.57446  
48677,-4.5262109656,-0.4978864423\H,-1.6513919426,-3.9413066594,-2.157  
9237645\H,-3.6797256265,-2.4337483237,-1.5605155917\H,-3.6184435372,-3  
.0290289617,0.0998109024\H,-3.5417862298,-1.2870296262,-0.2165709544\H  
, 2.7474386634,0.8627644068,-2.6402537115\H,1.9415099148,1.7568003916,-  
3.9400652405\H,2.8748482535,2.6283429739,-2.7228682519\H,0.7831036539,  
4.083869894,-2.1638073003\H,-0.1360347101,3.2085264789,-3.3869259671\H  
, -0.7320048652,3.2802029978,-1.7193194733\C,3.5265252934,4.3097994809,  
1.5037583345\C,4.5142331376,4.7885616633,0.6387295339\C,3.4004006434,4  
.9558960546,2.7364306443\C,5.3038153524,5.8614660658,1.0353912776\C,4.  
2443752182,6.0184725836,3.0371700672\N,5.1871245203,6.4803004339,2.212  
4572807\H,4.684625631,4.3165887717,-0.3241142207\H,2.6375980874,4.6520  
338374,3.4467823666\H,6.0783615669,6.2406371224,0.3718600366\H,4.15272  
79769,6.5317347045,3.9921559167\C,-1.4146070389,-3.9356439194,4.041051  
8789\C,-0.515184845,-4.3870253016,5.0108489326\C,-2.7066827284,-4.4669  
272569,4.0829849316\C,-0.9392136327,-5.320221267,5.9494663593\C,-3.027  
4087212,-5.3987429353,5.0631073974\N,-2.1714098534,-5.831586786,5.9915  
781752\H,0.5119607532,-4.0350195344,5.021501501\H,-3.4630307149,-4.141  
4219134,3.37529836\H,-0.2463256555,-5.6829984049,6.7059424626\H,-4.030  
6988145,-5.8173252847,5.1092432644\C,-1.7552974584,-0.6208362762,-5.32  
50294429\C,-2.1034622078,0.4959652077,-6.089888647\C,-1.8914004651,-1.  
8705777864,-5.935378724\C,-2.5563853618,0.3146455784,-7.3911940319\C,-  
2.3575205505,-1.9418897352,-7.2429586286\N,-2.6895387203,-0.877478557,  
-7.9769633709\H,-2.0465460944,1.4951418297,-5.668884447\H,-1.614843248  
5,-2.778736017,-5.4083447932\H,-2.8350445366,1.175986133,-7.9950328905  
\H,-2.4645392725,-2.9087906368,-7.7303010965\\Version=ES64L-G09RevD.01  
\HF=-1840.6398318\RMSD=2.804e-09\RMSF=5.399e-06\ZeroPoint=0.6865557\Th  
ermal=0.7235038\Dipole=0.0049776,-0.0052707,-0.0004962\DipoleDeriv=0.2  
107118,0.0016142,0.0477404,-0.0016751,0.1644575,0.0594001,0.0410355,0.  
0638493,0.174944,0.0186353,0.1546823,0.0674546,0.2172584,0.1190209,0.2  
368792,-0.1284026,-0.0169081,-0.5284831,0.219989,-0.0630313,0.6740119,  
-0.0571388,-0.1082359,0.2367955,0.6713222,0.2415016,1.8678241,-0.89313  
81,-0.9396646,-0.3803794,-0.9408381,-1.6111131,0.2625875,-0.382003,0.2  
623277,-2.1478694,0.8099347,0.9468967,0.2953037,0.9382616,1.2372458,0.  
4811535,0.2964299,0.4787018,-0.058337,-0.2096758,-0.1596944,0.0224811,  
-0.2489195,-0.4254884,-0.1119096,0.1936824,0.1531689,0.2422118,0.13712  
81,0.2954247,-0.4918535,0.2914999,0.9241893,-1.0499823,-0.4920482,-1.0  
522845,0.9188549,0.0197514,0.1636174,0.0317362,0.1094912,-0.008458,0.1  
470078,0.2105246,0.4160082,-0.4035056,0.1930303,0.0148798,-0.0374505,0  
.0266504,0.2422081,-0.0212176,-0.0356387,-0.0186926,0.1131213,-0.25215  
43,-0.1696572,-0.1028657,-0.0734016,-0.1289999,-0.1920445,-0.2867319,-  
0.4479379,-0.0133009,-0.1653302,0.0589054,-0.3566638,-0.0209824,0.0315  
424,-0.40815,-0.1568577,-0.1598595,-0.2599321,0.1534976,-0.0463529,-0.  
0230803,-0.0425318,0.1480822,-0.02888,-0.012253,-0.0349363,0.2479749,-  
0.1193955,-0.1520771,0.295538,-0.0859927,-0.3855524,0.3572564,0.126552  
5,0.0836164,0.1122617,-0.0046838,0.1266013,0.0500609,0.0462541,-0.0419  
007,-0.0083566,-0.0013915,-0.0672093,-0.0304823,-0.0713423,-0.0729266,  
-0.027875,-0.0731154,-0.1129394,-0.0018049,-0.0225106,-0.0055885,-0.10  
00665,-0.103223,0.0135212,0.004405,0.0832555,0.0251869,0.0024596,0.076  
626,0.0443769,-0.0004425,-0.0826783,0.0384013,-0.0198351,0.0888487,-0.

0399458, 0.0813859, 0.0262922, -0.0079959, 0.0451557, -0.0500281, -0.0436151, -0.0340921, -0.0377302, -0.0741383, 0.003232, -0.0379849, 0.0044536, -0.1578168, -0.0396796, 0.0510505, 0.0800923, 0.0256282, -0.0613974, -0.1027299, 0.0343036, -0.0032695, 0.0214085, -0.1027234, -0.0083677, 0.086862, 0.0564392, 0.0095487, -0.0522368, -0.0007851, -0.0450956, 0.015042, -0.0526777, -0.0490848, -0.0025503, -0.0534018, -0.1017281, 0.0443254, -0.005877, 0.0474264, -0.1281353, -0.0461379, 0.1281114, -0.0621809, 0.0411437, -0.0423484, -0.0200615, 0.0045898, -0.0182257, 0.0101788, 0.0081488, -0.0008935, 0.0089493, -0.0088331, 0.0010177, -0.0115678, -0.0365026, 0.0055062, -0.0259901, 0.0083123, -0.0111186, -0.0360349, 0.0025285, 0.0002836, 0.0059947, 0.0082592, -0.0088724, -0.0272885, -0.002485, -0.0448959, -0.0108242, -0.0003004, -0.0136561, -0.006036, 0.0053823, -0.0069411, -0.0029155, -0.0032089, 0.0033578, -0.0006784, -0.0443498, -0.0121342, -0.0093649, -0.0103121, -0.0073399, -0.002781, 0.0023392, 0.0059518, -0.0080936, -0.0287281, -0.0070233, 0.0328415, 0.0095201, 0.0028472, -0.0165064, 0.0024591, -0.0270765, 0.0157518, 0.0010546, -0.0082427, 0.0030375, -0.0086885, 0.0347307, -0.0082903, 0.082291, 0.0014013, -0.0562372, 0.0240527, 0.1317385, -0.0168171, -0.0736481, -0.0318292, -0.066443, 0.0966551, -0.0128671, 0.0481579, -0.029392, 0.0170492, 0.0867043, 0.0494345, 0.1121833, 0.0231731, 0.0954606, -0.0203831, 0.0700728, -0.0278379, 0.021451, 0.1071939, 0.0433538, 0.0903623, 0.0238739, 0.0237602, -0.0804508, -0.0437992, -0.0908855, -0.0053289, -0.0501339, -0.0156953, -0.0410397, 0.1274931, 0.0284158, -0.0862651, -0.0313486, -0.0816942, -0.008798, -0.0317536, -0.0308304, -0.0627925, 0.1243028, 0.0840328, 0.0056557, -0.0682057, 0.0144199, 0.124911, -0.0400531, -0.05637, -0.0158081, -0.0673899, 0.0118662, 0.0467517, 0.0429194, 0.0584943, 0.017732, -0.0503093, 0.0794662, -0.0744323, -0.0183991, -0.0517904, -0.086076, -0.0485759, -0.1125029, -0.0534819, -0.0751448, -0.0515896, -0.0545751, 0.0537703, 0.0493189, -0.0153079, 0.0477605, 0.0014974, -0.041924, 0.1301503, 0.0279364, 0.1259729, -0.0653948, 0.0442534, -0.0161081, 0.0579496, -0.0192629, -0.0075634, 0.1324286, 0.0634653, 0.1006222, -0.074699, -0.0248791, -0.1009225, -0.0528515, -0.0873663, -0.082666, -0.0910902, -0.0356228, -0.0747574, 0.0471606, -0.0686093, 0.0758092, -0.0231343, 0.0639203, 0.0302639, 0.0055024, -0.057425, 0.0289713, 0.0493627, -0.1110885, 0.0433024, 0.0250002, 0.0026262, 0.0582573, -0.0046236, 0.0084078, -0.0081318, 0.0645532, 0.0398361, -0.0455856, 0.0511573, -0.0293834, -0.0758523, 0.100464, 0.0558709, 0.1276164, -0.0108269, 0.0271428, -0.0037262, -0.0818157, 0.0085153, 0.0625308, -0.05022, -0.0773031, -0.0752162, -0.1416601, 0.0064569, 0.00545, -0.0800638, -0.0021323, 0.0681777, -0.0328919, -0.1111845, -0.0401805, -0.1270519, 0.0149697, -0.0425986, 0.0664878, -0.060709, -0.0510175, 0.1081575, 0.0845961, 0.1132647, -0.0202606, 0.0351364, 0.0363991, 0.0152956, 0.0779097, -0.0716546, -0.0540828, 0.0311222, -0.0502253, 0.0483904, 0.0056976, 0.0657721, -0.000799, 0.0981636, -0.0549997, 0.0142124, -0.0237667, 0.0364132, 0.0602694, 0.0506798, 0.0214023, -0.0623193, 0.0140765, 0.0749556, -0.0163006, -0.0307124, -0.013736, -0.170238, -0.0557354, -0.1056725, -0.006564, -0.1198359, -0.0809479, -0.022845, -0.0198144, -0.0400936, 0.0857455, -0.0153804, -0.1134829, -0.0094792, -0.086556, -0.1104578, -0.0341223, -0.0196153, -0.0455348, 0.0795876, 0.0333187, 0.0283521, -0.0700789, 0.020839, 0.0720917, -0.0104287, -0.0769153, 0.0143078, -0.1631753, -0.0628622, 0.0407875, 0.0672482, 0.0103094, 0.0585553, -0.0005094, 0.0910266, -0.0209265, 0.0152198, 0.4072626, 0.4239306, 0.0928951, 0.4289843, 0.6061118, 0.1978969, 0.0835337, 0.2057727, 0.1780647, -0.3888661, -0.2793482, 0.0127708, -0.2941132, -0.3579147, 0.0663393, -0.0200022, 0.0498944, -0.0333242, -0.1425236, -0.1598985, -0.171887, -0.1423488, -0.4234821, -0.2478351, -0.159981, -0.2183751, -0.2161933, 0.3800539, 0.2814917, -0.1443085, 0.2906434, 0.2957373, -0.0342164, -0.081029, 0.0410724, 0.2120437, 0.1608876, 0.1759718, 0.0446673, 0.1670888, 0.3691032, 0.2813719, -0.0155529, 0.2024864, 0.3597344, -0.4976866, -0.2216528, -0.018195, -0.224421, -0.5873705, -0.1077689, -0.0100475, -0.1123901, -0.4248895, 0.1244636, 0.0338865, 0.0185282, 0.0135095, 0.0703683, -0.0733659, 0.0276641, -0.0742274, -0.039954, 0.0085236, -0.0438943, 0.0793653, -0.0296842, 0.1094382, 0.0525032, 0.0912715, 0.0394067, 0.0334705, -0.0415133, -0.0821879, 0.0824723, -0.0663204, 0.0375524, 0.0225795, 0.1075924, 0.0457981, -0.0089056, 0.0687108, -0.0035061, 0.0307296, -0.0207869, 0.0131702, -0.0864101, 0.007716, -0.1113649, -0.0928467, 0.2160945, 0.1620322, -0.1480572, 0.1705347, 0.4682885, -0.4471904, -0

.1386218,-0.4520176,0.5065278,-0.0144206,0.0257777,-0.0103268,0.0595997,-0.3264036,0.2781492,-0.0308146,0.2654582,-0.4434478,-0.2257195,-0.2149176,0.1930286,-0.229602,-0.3256458,0.165723,0.2287788,0.1718796,-0.2313626,0.2285736,0.0158575,0.0761222,-0.0310732,0.2656613,-0.3143839,0.1436127,-0.2572954,0.3945551,0.4049216,0.1906436,-0.0543118,0.2344047,0.2471489,-0.1715381,-0.1241761,-0.2264611,0.2350829,-0.4468456,-0.0883308,0.0483751,-0.0948576,-0.5143716,0.2338651,0.0425554,0.2359716,-0.5467089,-0.0588991,-0.0630904,0.0119403,-0.0644973,0.1011987,-0.0209489,0.0001953,-0.0028031,0.1118864,0.0309957,0.0553895,-0.0923517,0.0375605,0.0869148,0.0386461,-0.0983062,0.0276394,0.0332331,-0.0187409,0.0487985,-0.1075663,0.024263,0.0437166,0.066834,-0.0806308,0.0769628,-0.0375118,-0.1137432,-0.0949554,0.0238978,-0.0734508,0.0393107,0.0300509,-0.0047306,0.0207189,0.0634155,0.1437662,0.0103977,0.2979742,-0.0025979,0.1600836,0.0835021,0.2983719,0.0801292,0.8863844,-0.178501,0.0560258,-0.1759687,0.0315428,-0.0502283,0.140292,-0.1774601,0.170854,-0.5506124,-0.1426691,-0.0907227,-0.1219738,-0.088993,-0.1274819,-0.217884,-0.1152555,-0.2572658,-0.5138305,0.0995976,-0.0847254,0.2122573,-0.0527019,0.2926478,-0.0899762,0.1843512,-0.1810522,0.496057,0.0572847,0.0546732,0.1213636,0.0270191,0.3537428,0.1436385,0.1469419,0.2359693,0.4763292,-0.3439841,-0.0016599,-0.1584464,0.0071047,-0.4306569,-0.0387745,-0.1584504,-0.0345686,-0.7351822,0.1138474,-0.0199422,0.0191944,-0.0100065,-0.0476015,-0.0790437,-0.000356,-0.0730283,0.0875172,0.0901052,0.0322442,-0.0349063,0.0465776,-0.0159504,0.0862923,-0.0184352,0.0899633,0.0782639,0.0704461,0.037318,-0.0485785,0.0513737,-0.0653202,0.1080464,-0.044496,0.0734888,-0.0159873,0.0842487,-0.0118032,-0.0214106,-0.0223931,-0.100277,-0.1053278,-0.0249592,-0.0704091,0.0039857\Polar=375.9844066,163.8365217,500.3364978,66.4946844,-46.2359665,593.8274455\PG=C01 [X(C42H36N4)]\NImag=0\0.47670111,0.03764257,0.49068611,0.02897598

## 6.4.2 OLYP/6-311+G(d,p)

1\1\GINC-XE29TH18\SP\ROLYP\6-311+G(d,p)\C42H36N4\DRAL\02-Apr-2015\0\#\P OLYP/6-311+G(d,p) SCF=Tight SCFCyc=1200 Name=Dral Pop=(Full,NBO) GFI NPUT GFPRINT Density=Current\4\0,1\C,0,0.938352,1.899681,-1.991387\C,0,0.034226,0.709014,-2.252707\C,0,-0.338221,-0.219188,-1.261127\N,0,0.12698,-0.088021,0.071132\C,0,0.971532,0.993999,0.423315\C,0,1.364891,1.947158,-0.535677\C,0,-0.2544,-1.037354,1.051712\C,0,0.208417,-0.933795,2.377943\C,0,1.114639,0.18145,2.866873\C,0,1.441502,1.146464,1.742208\C,0,-1.186414,-1.281139,-1.630324\C,0,-1.679553,-2.33854,-0.659781\C,0,-1.107296,-2.110302,0.727387\C,0,2.261043,2.223172,2.063592\C,0,2.655113,3.172927,1.132719\C,0,2.189868,3.002931,-0.162766\C,0,-0.434166,0.555638,-3.553157\C,0,-1.267761,-0.485166,-3.9346\C,0,-1.626342,-1.388773,-2.945386\C,0,-1.469094,-3.026225,1.709363\C,0,-1.01684,-2.943632,3.017876\C,0,-0.17514,-1.883234,3.319121\C,0,2.430215,-0.435466,3.397894\C,0,0.395475,0.954201,3.998254\C,0,-1.236246,-3.731089,-1.168086\C,0,-3.222989,-2.26863,-0.580347\C,0,2.200868,1.78059,-2.877623\C,0,0.167887,3.196213,-2.336077\H,0,2.632563,2.312249,3.079227\H,0,2.463696,3.740229,-0.910177\H,0,-0.116488,1.266541,-4.308762\H,0,-2.302213,-2.196752,-3.205836\H,0,-2.114286,-3.85522,1.437855\H,0,0.17583,-1.777175,4.34036\H,0,2.943519,-0.981241,2.600292\H,0,3.108624,0.336114,3.773367\H,0,2.238267,-1.132074,4.219282\H,0,0.148263,0.296166,4.836097\H,0,1.024143,1.759463,4.389308\H,0,-0.533532,1.396501,3.625915\H,0,-0.145473,-3.783641,-1.236713\H,0,-1.574465,-4.526211,-0.497886\H,0,-1.651392,-3.941307,-2.157924\H,0,-3.679726,-2.433748,-1.560516\H,0,-3.618444,-3.029029,0.099811\H,0,-3.541786,-1.28703,-0.216571\H,0,2.747439,0.862764,-2.640254\H,0,1.94151,1.7568,-3.940065\H,0,2.874848,2.628343,-2.722868\H,0,0.783104,4.08387,-2.163807\H,0,-0.136035,3.208526,-3.386926\H,0,-0.732005,3.280203,-1.719319\C,0,3.526525,4.309799,1.503758\C,0,4.514233,4.788562,0.63873\C,0,3.400401,4.955896,2.736431\C,0,5.303815,5.861466,1.035391\C,0,4.244375,6.018473,3.03717\N,0,5.187125,6.4803,2.212457\H,0,4.684626,4.316589,-0.324114\H,0,2.637598,4.652034,3.446782\H,0,6.078362,6.240637,0.37186\H,0,4.152728,6.531735,3.992156\C,0,-1.414607,-

3.935644,4.041052\C,0,-0.515185,-4.387025,5.010849\C,0,-2.706683,-4.46  
6927,4.082985\C,0,-0.939214,-5.320221,5.949466\C,0,-3.027409,-5.398743  
,5.063107\N,0,-2.17141,-5.831587,5.991578\H,0,0.511961,-4.03502,5.0215  
02\H,0,-3.463031,-4.141422,3.375298\H,0,-0.246326,-5.682998,6.705942\H  
,0,-4.030699,-5.817325,5.109243\C,0,-1.755297,-0.620836,-5.325029\C,0,  
-2.103462,0.495965,-6.089889\C,0,-1.8914,-1.870578,-5.935379\C,0,-2.55  
6385,0.314646,-7.391194\C,0,-2.357521,-1.94189,-7.242959\N,0,-2.689539  
, -0.877479,-7.976963\H,0,-2.046546,1.495142,-5.668884\H,0,-1.614843,-2  
.778736,-5.408345\H,0,-2.835045,1.175986,-7.995033\H,0,-2.464539,-2.90  
8791,-7.730301\\Version=ES64L-G09RevD.01\State=1-A\HF=-1840.9138386\RM  
SD=8.621e-09\Dipole=0.0041761,-0.0059516,-0.0010087\Quadrupole=10.3036  
336,-1.2111382,-9.0924954,-14.0832063,-5.8457897,3.8192471\PG=C01 [X(C  
42H36N4)]\@



## 7 References

1. O. V. Dolomanov, L. J. Bourhis, R. J. Gildea, J. A. K. Howard and H. Puschmann, *J. Appl. Crystallogr.*, 2009, **42**, 339–341.
2. G. M. Sheldrick, *Acta Cryst.*, 2008, **64**, 112–122.
3. S. Ito, T. N. Murakami, P. Comte, P. Liska, C. Grätzel, M. K. Nazeeruddin and M. Grätzel, *Thin Solid Films*, 2008, **516**, 4613–4619.
4. S. Ito, M. K. Nazeeruddin, P. Liska, P. Comte, R. Charvet, P. Péchy, M. Jirousek, A. Kay, S. M. Zakeeruddin and M. Grätzel, *Prog. Photovolt: Res. Appl.*, 2006, **14**, 589–601.
5. M. J. Frisch, G. W. Trucks, H. B. Schlegel, G. E. Scuseria, M. A. Robb, J. R. Cheeseman, G. Scalmani, V. Barone, B. Mennucci, G. A. Petersson, H. Nakatsuji, M. Caricato, X. Li, H. P. Hratchian, A. F. Izmaylov, J. Bloino, G. Zheng, J. L. Sonnenberg, M. Hada, M. Ehara, K. Toyota, R. Fukuda, J. Hasegawa, M. Ishida, T. Nakajima, Y. Honda, O. Kitao, H. Nakai, T. Vreven, J. A. Montgomery Jr., J. E. Peralta, F. Ogliaro, M. J. Bearpark, J. Heyd, E. N. Brothers, K. N. Kudin, V. N. Staroverov, R. Kobayashi, J. Normand, K. Raghavachari, A. P. Rendell, J. C. Burant, S. S. Iyengar, J. Tomasi, M. Cossi, N. Rega, N. J. Millam, M. Klene, J. E. Knox, J. B. Cross, V. Bakken, C. Adamo, J. Jaramillo, R. Gomperts, R. E. Stratmann, O. Yazyev, A. J. Austin, R. Cammi, C. Pomelli, J. W. Ochterski, R. L. Martin, K. Morokuma, V. G. Zakrzewski, G. A. Voth, P. Salvador, J. J. Dannenberg, S. Dapprich, A. D. Daniels, Ö. Farkas, J. B. Foresman, J. V. Ortiz, J. Cioslowski and D. J. Fox, eds., *Gaussian 09*, Revision D.01 edn., Gaussian, Inc., Wallingford, CT, USA, 2009.
6. J.-D. Chai and M. Head-Gordon, *Phys. Chem. Chem. Phys.*, 2008, **10**, 6615-6620.
7. M. S. Gordon, *Chem. Phys. Lett.*, 1980, **76**, 163-168.
8. J. S. Binkley, J. A. Pople and W. J. Hehre, *J. Am. Chem. Soc.*, 1980, **102**, 939–947.
9. M. S. Gordon, J. S. Binkley, J. A. Pople, W. J. Pietro and W. J. Hehre, *J. Am. Chem. Soc.*, 1982, **104**, 2797-2803.
10. J.-P. Blaudeau, M. P. McGrath, L. A. Curtiss and L. Radom, *J. Chem. Phys.*, 1997, **107**, 5016–5021.
11. R. Ditchfield, W. J. Hehre and J. A. Pople, *J. Chem. Phys.*, 1971, **54**, 724-728.
12. M. M. Franel, W. J. Pietro, W. J. Hehre, J. S. Binkley, M. S. Gordon, D. J. DeFrees and J. A. Pople, *J. Chem. Phys.*, 1982, **77**, 3654–3665.
13. W. J. Hehre, R. Ditchfield and J. A. Pople, *J. Chem. Phys.*, 1972, **56**, 2257-2261.

14. V. A. Rassolov, J. A. Pople, M. A. Ratner and T. L. Windus, *J. Chem. Phys.*, 1998, **109**, 1223-1229.
15. R. C. Binning Jr. and L. A. Curtiss, *J. Comput. Chem.*, 1990, **11**, 1206-1216.
16. V. A. Rassolov, M. A. Ratner, J. A. Pople, P. C. Redfern and L. A. Curtiss, *J. Comput. Chem.*, 2001, **22**, 976-984.
17. P. C. Hariharan and J. A. Pople, *Mol. Phys.*, 1974, **27**, 209-214.
18. P. C. Hariharan and J. A. Pople, *Theor. Chem. Acc.*, 1973, **28**, 213-222.
19. B. Miehlich, A. Savin, H. Stoll and H. Preuss, *Chem. Phys. Lett.*, 1989, **157**, 200-206.
20. C. Lee, W. Yang and R. G. Parr, *Phys. Rev. B*, 1988, **37**, 785-789.
21. W. M. Hoe, A. J. Cohen and N. C. Handy, *Chem. Phys. Lett.*, 2001, **341**, 319-328.
22. N. C. Handy and A. J. Cohen, *Mol. Phys.*, 2001, **99**, 403-412.
23. J.-P. Blaudeau, M. P. McGrath, L. A. Curtiss and L. Radom, *J. Chem. Phys.*, 1997, **107**, 5016-5021.
24. T. Clark, J. Chandrasekhar, G. W. Spitznagel and P. v. R. Schleyer, *J. Comput. Chem.*, 1983, **4**, 294-301.
25. M. J. Frisch, J. A. Pople and J. S. Binkley, *J. Chem. Phys.*, 1984, **80**, 3265-3269.
26. P. C. Hariharan and J. A. Pople, *Theor. Chem. Acc.*, 1973, **28**, 213-222.
27. S. Hashimoto, K. Seki, N. Sato and H. Inokuchi, *J. Chem. Phys.*, 1982, **76**, 163-172.
28. G. A. Zhurko and D. A. Zhurko, eds., *Chemcraft 1.7*, 2013.
